# Supplementary material for: The measurement of atmospheric CO 2 at KMA/GAW regional stations,the characteristics, and comparisons with other East Asian sites
Source: Copernicus journal article supplement (doi:10.5194/acp-2018-886), 2018-09-28
Supplement: Supplementary file [file acp-2018-886-AC2-supplement.pdf]

Authors response to both reviews follows. A copy of the reviewer comment is given (with bullet point 'number') followed by a response (blue font).

## Response to referee 2

1. Atmospheric measurement is a basis of top-down estimation of CO<sub>2</sub> emissions and uptakes. Given the increasing importance of East Asia in the global carbon budget, more number of high-quality measurements in the region helps carbon cycle studies. From this point of view, this work, which provides descriptions of hitherto unpublished CO<sub>2</sub> measurements and their characterization from Korea, is well acknowledged. This is a good contribution to the community and well within the scope of the ICDC10/GGMT-2017 special issue of ACP. My comments, which might be considered before acceptance of this manuscript, are detailed below.

We thank Referee 2 for the comments on this paper's value. We also appreciate your helpful comments to improve our manuscript.

2. I assume that "characteristics" and "comparisons" in the title are for variations observed at the different stations, and not for technical aspects of measurements. I would re-consider the title (in particular latter part) to make what is addressed in this manuscript clearer.

As you mentioned our paper discussed about 'measurement of CO<sub>2</sub>', 'the data characteristics' and 'comparisons with other stations'. So the title also considers those three issues. "The measurement" means process of experimentally obtaining one or more quantity values that can reasonably be attributes to a quantity (JCGM, 2012). WMO/GAW also has an agreement with BIPM that we assumed this title is appropriate in this time. If we directly address 'measurement techniques' in the title, the meaning cannot explain measurement activities such as the calibrations, data processing, and measurement uncertainties.

We hope referee can agree this title "The measurement of atmospheric CO<sub>2</sub> at KMA/GAW regional stations, the characteristics, and comparisons with other East Asian sites".

For above-mentioned reason, we revised the sentence, which contains the 'measurement' in the section 1 to make what is addressed in the manuscript more clear.

3. In the manuscript, the term "calibration" is used in different meanings. Sometimes the term is used to link instrument responses of an analyzer to known values of standards i.e. determination of the instrument response curves. In other places, the term is used to measure laboratory in-house cylinders for CO<sub>2</sub> mole fraction against standards at higher hierarchy levels i.e. propagation of CO<sub>2</sub> scale values from a standard to a standard. I would suggest to give definition of "calibration" at the beginning of section 2.3.1 and to use it exactly as same throughout the manuscript. It would improve readability of the section. In my understanding, "calibration" is in many cases used with the latter meaning in the WMO/GAW community.

The definition of calibration is “operation that, under specified conditions, in a first step, establishes a relation between the quantity values with measurement uncertainties provide by measurement standards and corresponding indications with associated measurement uncertainties and, in a second step, uses this information to establish a relation for obtaining a measurement result for an indication” (JCGM, 2012). This concept is same to WMO/GAW community and other measurement communities.

The calibration also is involved in scale propagation: traceability chain is the sequence of measurement standards and calibration that is used to relate a measurement result to a reference (JCGM, 2012).

So we improve section 2.3.1 in our manuscript with the definition of calibration as making it more clear for readers. Here, we revised uncertainty value of laboratory standards and working standard gases from 0.02 to 0.07 and from 0.05 to 0.088 ppm respectively according to the Table 2. Since 0.02 ppm and 0.05 ppm were precisions, it needs to make it clear. And few sentences are revised according to referee 1.

4. In this respect, it is important to clearly describe KMA's standard scale system. According to the text, “laboratory standards” provided from CCL (NOAA/ESRL) are positioned at the highest hierarchy (how many cylinders covering x ppm to y ppm?). Working standards routinely used at the stations are positioned at the 1 lower level and measured directly against “laboratory standards”. After this, sample air at the stations is measured against the working standards. These are fundamental information in maintaining the scale at KMA and in propagating the scale from CCL's primary standard cylinders to sample data in Korea. I suggest the authors to re-structure section 2.3.1 and present such basic information systematically in the very first paragraph. In addition, determination of the response curve of the CRDS instrument and long-term surveillance of instrument condition are different topics, which could come after the description of the standards.

We reconstructed section 2.3.1 according to your comments as including the number of cylinders, covering ranges and order of paragraphs. Please confirm the revised manuscript.

5. It would be a great help for readers if zoom-in maps of the 3 stations, which illustrate the surroundings of the stations as described in section 2.1, could be presented. The geographical scale of Figure 1 is still good in the context of relatively large-scale variations (e.g. Figs 8 and 9), but for smaller-scale phenomena that appear in Figs 4 to 7, information of surrounding geography play larger roles as discussed in the manuscript.

Thank you for the comment and it would be informative to readers. We added the more figures in Figure 1 which show the surrounding environment of each station.

(a)

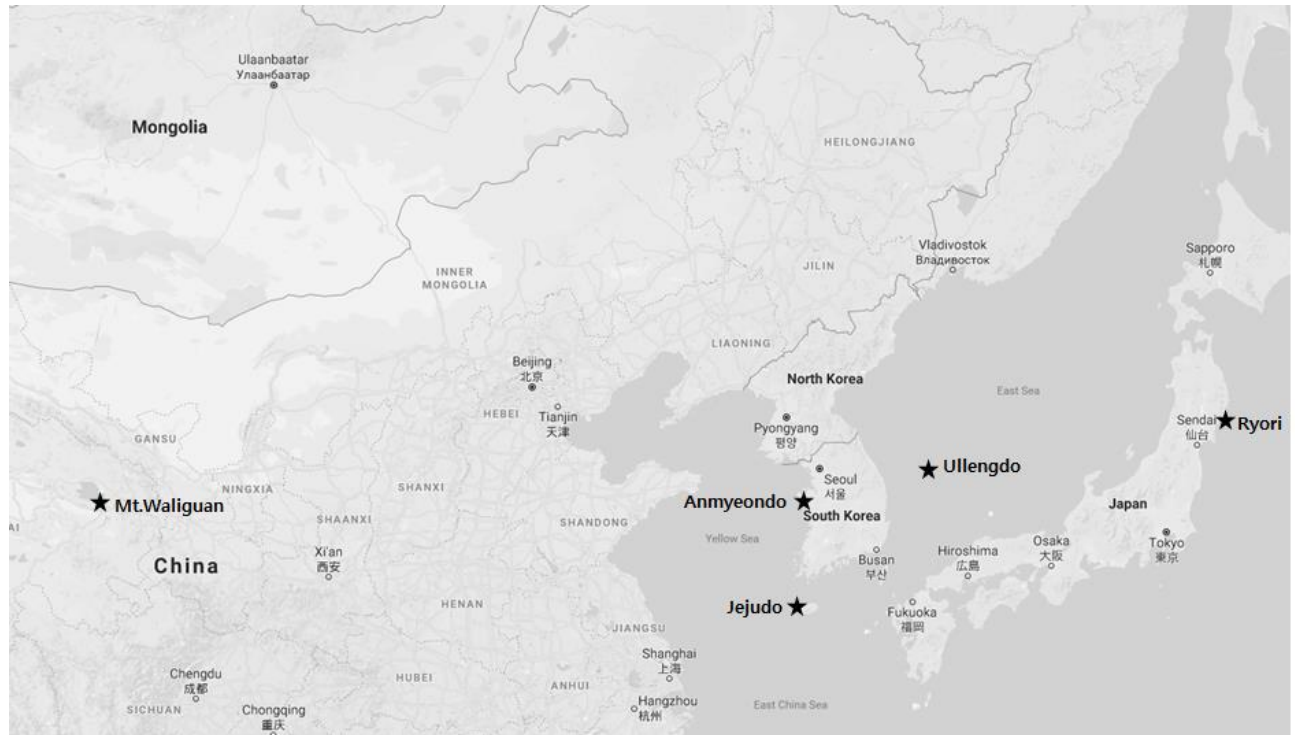

(b)

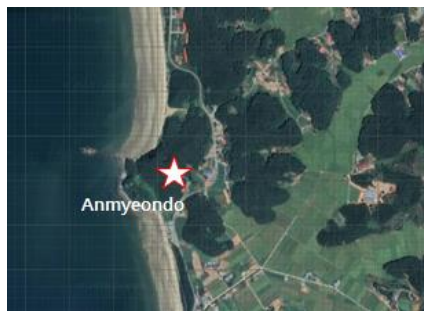

(c)

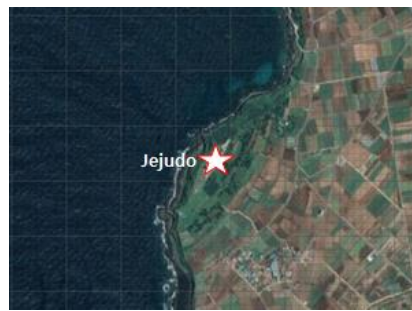

(d)

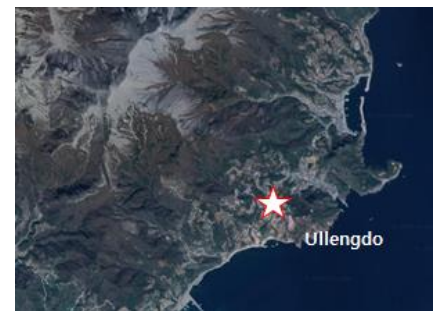

Figure 1. Locations of (a) the three KMA monitoring stations in Korea, and Mt. Waliguan WMO/GAW global station and Ryori WMO/GAW regional station in East Asia. Surrounding Environment of the (b) Anmyeondo (AMY), (c) Jeju Gosan Suwolbong (JGS), and (d) Ullengdo (ULD) station. Those figures are derived from Google map.

6. I think that the idea of “background” and “baseline” data (or CO<sub>2</sub> mole fraction) may not be consistent throughout the manuscript. In section 2.3.3, the authors define criterion for selecting “background” data. After that, in section 3.2, the authors define CO<sub>2</sub>BG which is defined the curve fitting by Thoning et al. I do not think these two “backgrounds” are in agreement. The latter is composed of the long-term trend and seasonal cycle, which reflect global, hemispheric to regional variations. In contrast, the former contains synoptic scale variations, for instance elevated CO<sub>2</sub> events caused by tracking cyclones which transport signals from continental CO<sub>2</sub> emissions (e.g. Tohjima et al. 2010, 2014). The authors split “local” CO<sub>2</sub> elevations and “background/baseline” CO<sub>2</sub> level only, but discussions on such synoptic variations (intermediate scale) are missing. Such events are however important in the regional context of monitoring emissions from China, to which the authors mention in introduction and conclusion as value of the dataset. I hope to see, even briefly, discussions on synoptic variations, since it would help future data users who address CO<sub>2</sub> emissions from China using the data presented in this study.

Thank you for the comments. We agree with your opinion that we tried to separate local/long range transported pollutions and baseline data. And also we keep the consistent meaning of baseline which is the result of fitting curve to reduce the noise due to synoptic-scale atmospheric variability and measurement gaps. We improved our relevant manuscript in section 2.3.3, 3.2 and 3.3.

We had the footprint of CO<sub>2</sub>s, which were presented in KMA (2014) and suggested below (Figure A). We did not present the figures on this paper since now we are improving our baseline selection method to apply for those footprints and preparing for another paper. However, we can provide those published figures as supplements if it is necessary. Therefore we mentioned this result briefly in the manuscript about this result in section 3.2.

We revised the Figures 4 to 6 in section 3.3 since in this section L2 hourly data was defined as baseline CO<sub>2</sub>. Therefore to avoid making readers confused, we showed bivariate polar plots with only L1 data. We also thought this plots are enough to explain local/regional effects on observed CO<sub>2</sub>. The observed CO<sub>2</sub> had been distinguished into baseline and pollutions in this section. However, we categorized into two groups as lower and high CO<sub>2</sub> after the revisions.

(a)

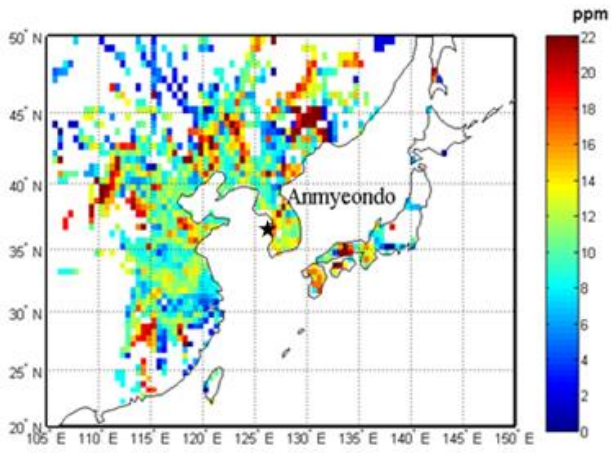

(b)

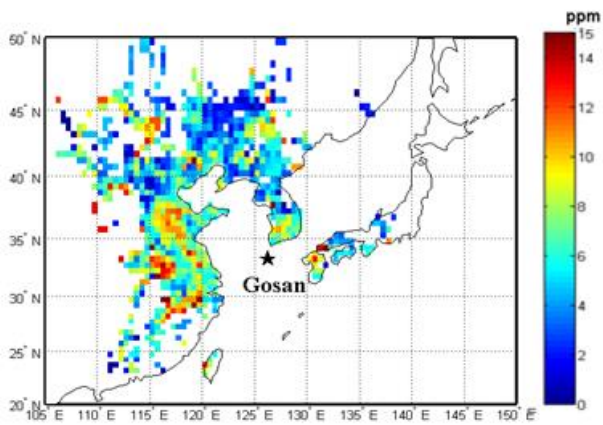

(c)

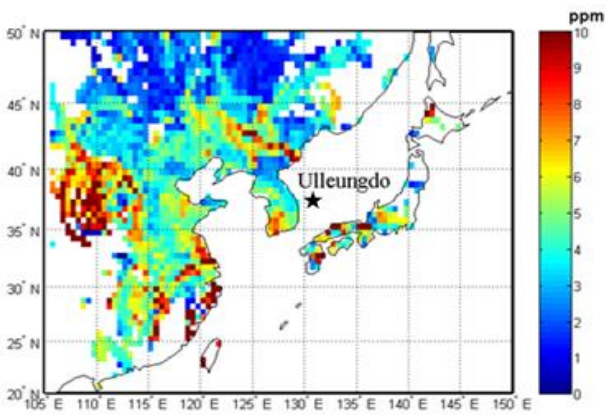

Figure A. The example of CO<sub>2XS</sub> footprints at (a) AMY, (b) JGS and (c) ULD from 2012 to 2013. 4 days backward trajectories at 500 m using HYSPLIT 4 model based on wind fields provided by NCEP GDAS. This figure was shown the Korea GAW report published in 2014. This method was applied by Li et al. (2014).

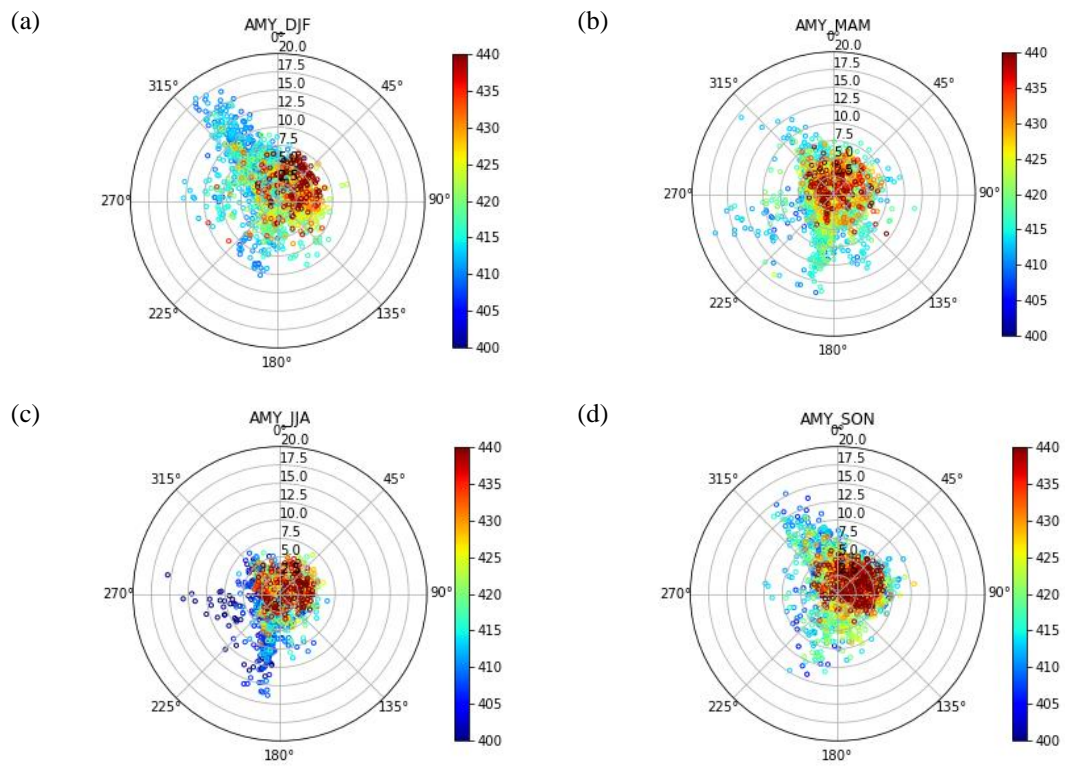

Figure 4. Bivariate polar plots for observed CO<sub>2</sub> (L1) in (a) winter, (b) spring, (c) summer, and (d) autumn at AMY in 2016

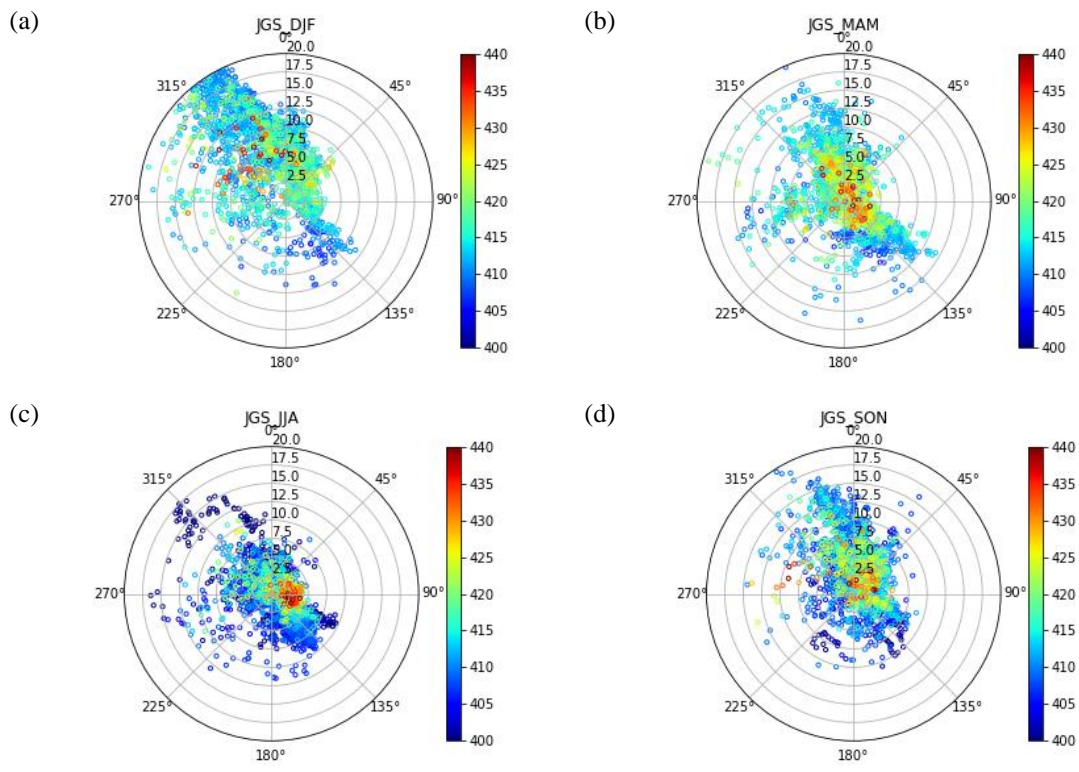

Figure 5. Bivariate polar plots for observed CO<sub>2</sub> (L1) in (a) winter, (b) spring, (c) summer, and (d) autumn at JGS in 2016

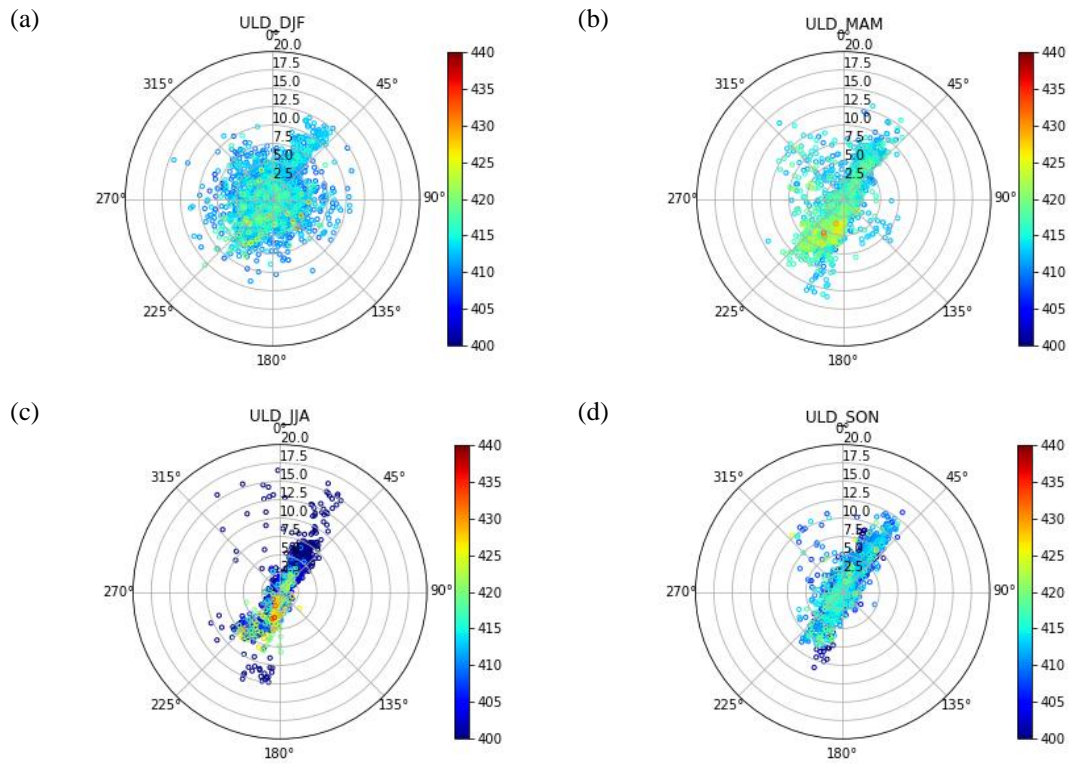

Figure 6. Bivariate polar plots for observed CO<sub>2</sub> (L1) in (a) winter, (b) spring, (c) summer, and (d) autumn at ULD in 2016



7. P3 L21: “can cool” to “can be cooled”

Corrected

8. P3 L21: this sentence might be reformulated to read “...-80° C, which makes the real temperature of inner air flow to be -50° C.” The -80° C seems to be a set temperature. Where is the temperature sensor placed?

The temperature sensor is for the cold trap to keep trap’s temperature not for air stream inside that it is located on the cold trap (between the surface and inner chamber). Even though the trap is cooled down to -80 °C (the set point), the air that comes from outside through the pump makes temperature inside of chamber increase. If the air doesn’t come into the trap from outside, the temperature inside the drying system would reflect the trap temperature as -80 °C. When monitored the inside temperature with air stream, it was about – 50 °C. And this is the key technique for this drying system. So we improve the manuscript in section 2.2 to make it clear as correcting according to your comments.

9. P3 L22: “drops it” and “cools it”—hard to get what “it” means. If I understand correctly, this sentence might be reformulated for instance, “The sample air is cooled to -20° C in the first trap, and then to -50° C in the second trap.”

We corrected according to your comments, please see revised section 2.2.

10. P3 L25: “One of the dual traps is used to dry ambient air for 24 hr while...”

Corrected

11. P3 L25: here “hr” is used instead of “hours” used at other places.

Corrected

12. P4 L20: See my comment above. Here the calibration means anchoring the analyzers’ responses to the CO<sub>2</sub> scale guaranteed by the standards.

We reconstructed and improved the manuscript in section 2.3.1. Please see the revised manuscript.

13. P4 L22: See my comments above. Here the calibration means to measure working standards against the CO<sub>2</sub> scale.

We corrected to make it clear. Please see revised manuscript in section 2.3.1.

14. P4 L22: See my comments above. This sentence is very unclear. Should this be read like “working standards used at AMY are those directly provided by CCL?”

We corrected to make it clear. Please see revised manuscript in section 2.3.1.

15. P4 L23: Insert “the” before “laboratory standards”

Corrected and we re-constructed this section.

16. P4 L23: Is the “laboratory standards” primary standards that realize the WMO scale i.e. those at highest hierarchy at KMA? If this is the case, the term like “KMA primary standards” might better clarify the standard category at KMA. How large CO<sub>2</sub> mole fraction range is covered by the “laboratory standards”? And are these “laboratory standards” same as the “4 standard gases” appearing at the beginning of the paragraph? In summary, questions are how many “KMA primary standards” (that cover XX to YY ppm in CO<sub>2</sub> mole fraction) are prepared and how many “working standards” (that cover XXX to YYY ppm) are prepared for each station? Please describe these information systematically. Also, with what kind of instrument are the working standards measured against laboratory standards?

We tried to make it clear. “Laboratory standard” is the glossary in WMO/GAW community. And also primary standard normally is considered the standards which are maintained at NOAA (WMO/GAW CCL) within WMO/GAW ([http://www.empa.ch/web/s503/gaw\\_glossary](http://www.empa.ch/web/s503/gaw_glossary)). So we thought it makes readers who are involved in WMO/GAW measurement get confused.

We added the definition for laboratory standard and the references. And also we have 4 laboratory standards at AMY, central lab for Korea GHG network, and 4 working standards at each station.

We make it correct. We tried to describe how to propagate the cylinder. Please see reconstructed and revised manuscript in section 2.3.1.

17. P4 L25: “When the scale is propagated” – this is normally called “calibration”. I understand that, firstly, working standards are calibrated against “laboratory standards” to assign them the WMO CO<sub>2</sub> scale values, and secondly, by analyzing these gases, the instrument responses are linked to the WMO CO<sub>2</sub> scale values.

We added the calibration definition according to your comment and try to make it clear.

18. P4 L26: Here “calibration” means to determine the instrument response curve.

We added the definition and try to make it clear in section 2.3.1

19. P4 L27: Again “calibration” is used same as above.

We added the definition and try to make it clear in section 2.3.1

20. P4 L30: Please exactly indicate the degree of agreement between KMA and CCL ( $\pm 0.0X \pm 0.0Y$  ppm) found from the Round Robin.

Corrected in section 2.3.1

21. P5 L12: “500 ppm”. First, I would expect that some CO<sub>2</sub>-elevated events (caused by “local” or “regional” sources) where CO<sub>2</sub> mole fraction exceeds 500 ppm can happen. This data treatment may perhaps lose data with scientific value. Second, since the atmospheric CO<sub>2</sub> mole fraction is increasing, I would use a value that well follows the atmospheric trend for instance XX ppm + the long-term trend. The constant value 500 ppm does not mean same as that in past or future years.

We totally agree with your comments. And we also cannot define all CO<sub>2</sub> > 500 ppm are invalid. Since we use the values of 500 ppm for CO<sub>2</sub> (due to human issue) and 3000 ppb for CH<sub>4</sub> (due to carrier gas from GC) to detect room air due to line leakage, we commented it. So we removed this sentence and also next sentence reflected this issue as well that it is not necessary to comment again.

22. P6 L30: “calibrations”

Since we corrected section 2.3.1, we let it remain as it is.

23. P7 L24: “ $1.0 \pm 1.9$  ppm at ULD”

Corrected

24. P7 L25: As in my earlier comment, I need to question if the positive values in CO<sub>2</sub>XS at the stations are simply ascribed to “local activities”.

We improved our manuscript, please see section 3.1.

25. P8 L5: “An automatic weather station...” This sentence might be moved to section 2.1.

We moved the information to the section 2.1.

26. P8 L15: What are the “tourist activities” specifically? Local transportation?

We added the information about tourist activities.

27. P8 L23: As in my earlier comment, the wording like signals of Chinese emissions in “baseline” data may be debatable. And “downwind of East Asia” – note that these two stations are also in East Asia.

We agree with your opinions that we removed the “baseline”.

And we revised “East Asia” as “continental air mass”. And we also replaced all words of East Asia to appropriate words within a context.

28. P8 L32: “the degree and speed of atmospheric mixing” If the authors means dynamics of the PBL, they might mention to rectifier effect (e.g. Denning et al. 1999; Chan et al. 2008). The wording might be re-considered. Same comment as P11 L13.

We improved the wording according to your suggestions in section 3.4

29. P9 L7: Although I am not a non-native in English, I wonder if “plateau” can represents stabilization after decrease (not increase).

Corrected

30. P9 L29: same comment as to P8 L23. AMY is also in East Asia.

We revised it as “...transported through the Yellow sea from the Asia Continent...”

31. P9 L10-15: Unfortunately, this paragraph does not try to explain possible causes of the diurnal variation observed in August. The up-valley and down-valley wind feature was already described in section 2.1. Here I hope to see discussions on how such a wind pattern or any possible sources/sinks upwind could affect variations in CO<sub>2</sub>.

For three stations, we simply compare the CO<sub>2</sub> diurnal cycle, wind directions and temperature not

only in August but also in other seasons (Figure B). The wind pattern is very clear in August at both of AMY and JGS. We could assume that AMY and JGS are affected by land-sea breeze that daytime CO<sub>2</sub> is mainly derived from ocean in August. It is very well matched with temperature. After temperature increase or decrease, the wind direction is changed with CO<sub>2</sub>. And the altitude of those stations is lower compared to ULD, it can be affected by vegetation easily. Therefore those two stations might be affected by the local wind pattern, the boundary layer and the vegetation.

On the other hand, at ULD, the air-mass mainly comes from the sectors between 0 to 90 degree and 210 to 300 regardless of seasons and time, even though the temperature pattern is very similar to other two stations. It means that the wind direction might not be related to the radiative cooling and warming effects. We assumed this is caused by complex terrain with small and high mountains that surround the station. Therefore, at ULD, diurnal CO<sub>2</sub> variation is less related to wind pattern but it is affected by active photosynthesis in summer at least. We tried to explain this issue clearly in section 3.4. It was supposed that the valley-mountain wind affected the diurnal pattern of CO<sub>2</sub> initially but it is only few cases. Therefore we cannot define that ULD is affected by the wind pattern and it needs to revise the sentences including this comment. We also improved the section 2.1 with detailed geological information around ULD.

(a)

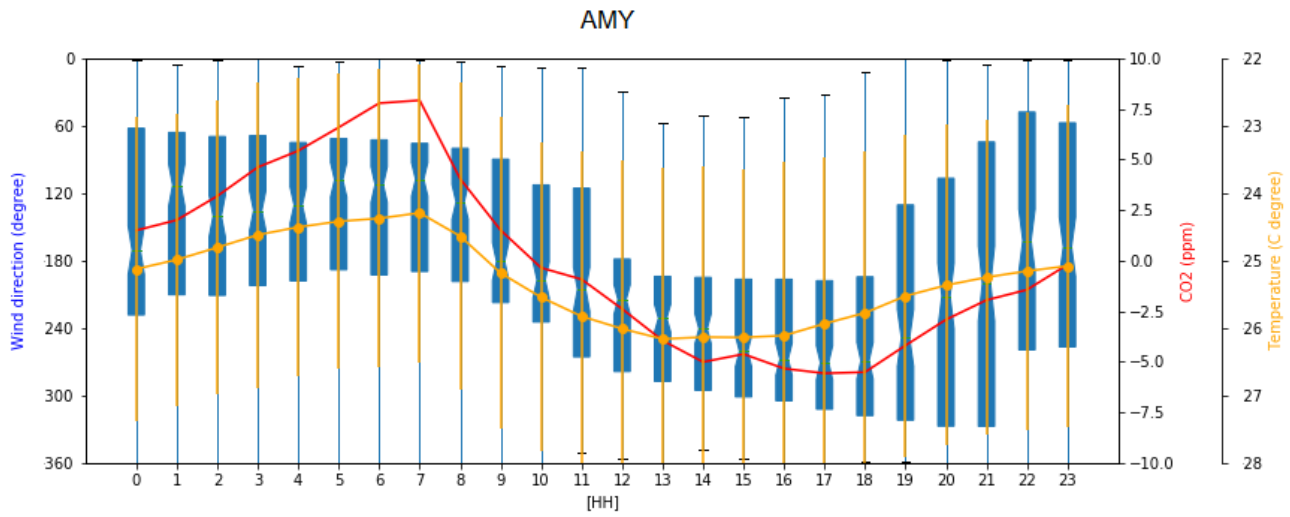

(b)

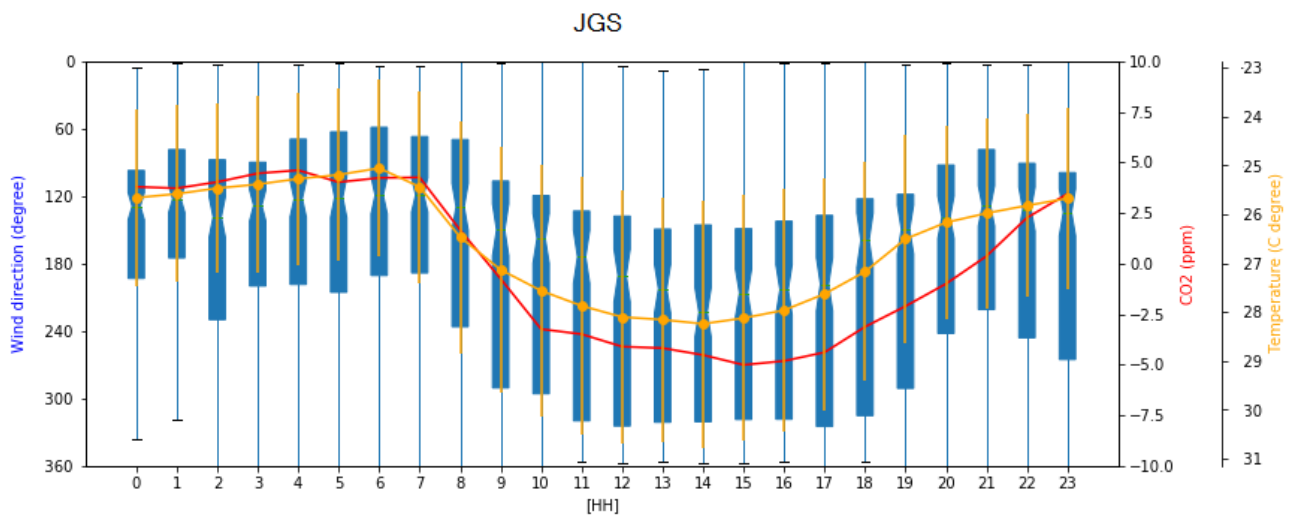

(c)

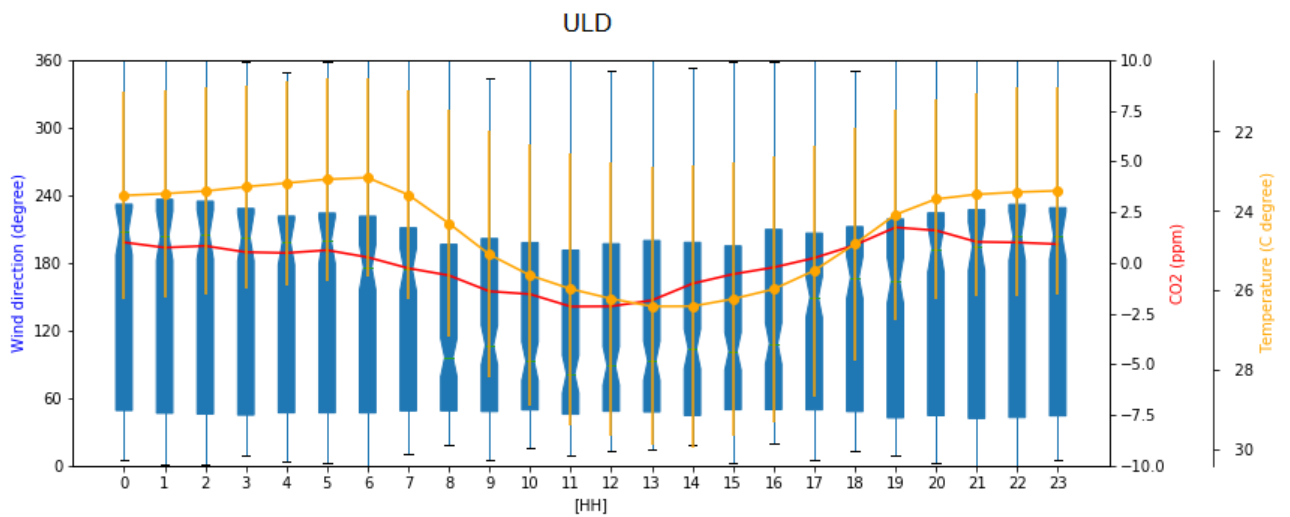

Figure B. The wind directions (blue box plot) temperature (orange), and CO<sub>2</sub> diurnal cycle (red line) at (a) AMY, (b) JGS, and (c) ULD.

32. P9 L25: “4.8 to 5.8 ppm” and “-6.8 to -9.6 ppm” I guess these values are deviations from a certain value like an annual average from each station. Please explain.

It is the maximum and minimum values cross the stations that we suggested where the value was derived from on table 3.

33. P10 L15–23: All detailed technical information should be moved to section 2. In this section the authors should focus on how such technical events affected the measurement data.

We moved the relevant sentences to the technical descriptions to the section 2.2. and 2.3.1 Please confirm the revised Section 2.3.1 Calibration method in the response # 3 as well. We also revised Table 1 regarding to the revised section 2.

Table 1. Information about the three KMA monitoring stations in Korea and the two monitoring stations in East Asia

| Station                    | ID           | Longitude | Latitude | Altitude | Inlet height | Measurement History                          |
|----------------------------|--------------|-----------|----------|----------|--------------|----------------------------------------------|
| Anmyeondo, Korea           | AMY          | 126.32°E  | 36.53°N  | 47 m     | 20 m<br>40 m | Since 1999 to July, 2004<br>Since July, 2004 |
| Jejudo<br>Suwolbong, Korea | Gosan<br>JGS | 126.16°E  | 33.30°N  | 71.47 m  | 6 m          | Since 2012                                   |
| Ulleungdo*, Korea          | ULD          | 130.90°E  | 37.48°N  | 220.9 m  | 10 m         | Since 2012                                   |
| Mt. Waliguan, China        | WLG          | 100.90°E  | 36.28°N  | 3810 m   | 5 m          | Since 1990                                   |
| Ryori, Japan               | RYO          | 141.82°E  | 39.03°N  | 260 m    | 20 m         | Since 1987                                   |

34. P11 L7: “using” to “relative to”

Corrected

35. P11 L10: “regionally” to “locally”

Corrected. And also we revised the word “selected CO2 mole fractions” to “The CO2 mole fractions observed ..” since “selected” can be understood as “the selected baseline conditions”.

36. P11 L11: What is “the long-transported CO2 levels”? High wind speed does not explain the relatively low CO2 level.

We agree to your opinions and improved sentence in section 4. As you mentioned high wind speed cannot result in long range transported CO2 while it can provide the environment that less

affected by local sources. So we explained it.

37. P11 L15: "Due to its location it is..." My understanding is that the latter "it" means "CO<sub>2</sub> mole fraction observed at ULD". If this is the case, this sentence is strange. Mountain and valley breezes cannot change CO<sub>2</sub> mole fraction directly.

We agree with your comments and as we described the characteristics of ULD at #31. We removed this sentence since we thought it is very unclear.

38. P11 L17: delete "added"

Corrected

39. Table 3 caption: "abundances" to "mole fractions".

Corrected

40. Table 3: According to the caption, the uncertainties are simple standard deviations calculated from the all data collected during the respective years. It includes signals of the all components: the long-term, seasonal, synoptic-scale and diurnal variation, and results in too big estimates of uncertainties of the annual mean values. Indeed, the numbers tabulated in Table 3 apparently show that there are no significant differences in annual means between every successive years (i.e. no trend is detectable). The authors should calculate uncertainty that better represent an estimate of error of an average.

We agree the referee's comment. The uncertainty is totally different from the standard deviations. On the other hand, to estimate the uncertainty from the measurement is very challenging for not only Korea network but also other stations which we downloaded data from World Data Centre since data provider did not show their uncertainty factors such as repeatability and reproducibility. On the other hand, we explained our measurement uncertainties in section 3.1 to help readers understand our measurement uncertainty, which are different from the hourly, daily and monthly standard deviations. Therefore we just clarified the standard deviation is not uncertainty here as revising the caption of table 3.

Though the referee commented, the similar mean values at ULD are not the result of mis-calculation. We had discussed this before submitting this paper but could not find out clear reason. We just could find that the monthly mean from July to August is lower than those values in previous years. It seems to lead similar annual mean in 2014 to that value in 2013 and low growth



rate in 2014. On the other hand, we cannot distort our data or delete without certain reasons that we just decided to submit the data itself. After taking your comment, we looked at the data again, checked all flags and any other environmental issues, but still unclear. In this time, we addressed this issue directly in the paper for the readers who are interested in it. We added the sentence “The low growth rate in 2014 at ULD might cause from no significant annual differences between 2013 and 2014 although the reasons is still unclear. Further studies are necessary to fully understand those results.” Please see the revised section 3.5.

# The measurement of atmospheric CO<sub>2</sub> at KMA/GAW regional stations, the characteristics, and comparisons with other East Asian sites

Haeyoung Lee<sup>1,2</sup>, Sang-Ok Han<sup>1</sup>, Sang-Boom Ryoo<sup>1</sup>, Jeong-soon Lee<sup>3</sup>, and Gang-woong Lee<sup>2</sup>

1 Environmental Meteorology Research Division, National Institute of Meteorological Sciences, Jeju, 63568, Republic of Korea

2 Atmospheric Chemistry Laboratory, Hankuk University of Foreign Studies, Gyeonggi-do, 17035, Republic of Korea

3. Korea Research Institute of Standards and Science, Daejeon, 34113, Republic of Korea

Correspondence to Haeyoung Lee ([leehy80@korea.kr](mailto:leehy80@korea.kr))

*Abstract. To understand the carbon cycle at policy-relevant spatial scales, a high density of high-quality CO<sub>2</sub> measurement sites is needed. In 2012, the Korea Meteorological Administration (KMA) installed CO<sub>2</sub> monitoring systems at Anmyeondo (AMY) in west, Jeju Gosan Suwolbong (JGS) in south-west and Ulleungdo (ULD) in east parts of Korea. Three stations were instrumented with identical greenhouse gas measurement systems based on Cavity Ring Down Spectroscopy (CRDS) and a new drying system developed by KMA and Korea Research Institute of Standards and Science (KRISS). This drying system is suitable in the humid areas; water vapour measured by the CRDS in ambient air was 0.001 to 0.004% across the stations. Measurement uncertainties expressed by the quadrature sum of the uncertainties from the drying system, scale propagations, repeatability, and reproducibility were ~ 0.11 ppm from all KMA stations in 68% confidence interval. Average monthly CO<sub>2</sub> enhancements above the local background at each station were  $4.3 \pm 3.3$  ppm at AMY,  $1.7 \pm 1.3$  ppm at JGS and  $1 \pm 1.9$  ppm ( $1\sigma$ ) at ULD respectively during 2012 to 2016. At AMY station, located between China and Korea, CO<sub>2</sub> annual means and seasonal variations are also greater than the other KMA stations indicating that it is affected not only by local vegetation, but also added anthropogenic sources. Selected baseline CO<sub>2</sub> at AMY and at JGS in the west part of Korea are more sensitive to East Asia according to wind direction and speed. Through the comparison of long-term trends and growth rates at AMY with other East Asian stations over 15 years, it was suggested that they could be affected by not only local vegetation but also measurement quality.*

## 1. Introduction

Carbon dioxide, the most important anthropogenic greenhouse gas, is one of the main drivers of climate change on Earth. Measurements of atmospheric CO<sub>2</sub> have assumed increased importance to track the increase in global CO<sub>2</sub> due to fossil fuel combustion (Canadell et al., 2007; Knorr, 2009).

Roughly half of anthropogenic CO<sub>2</sub> emitted by fossil fuel combustion is stored in the atmosphere, whereas the other half is absorbed by the oceans and terrestrial ecosystems. Recent studies showed the atmospheric CO<sub>2</sub> network is not yet dense enough to confirm or invalidate the increased global carbon uptake, estimated from ocean measurement or ocean models (Wanninkhof et al., 2012) but emphasized that the combination of a highly dense observation network, coupled with atmospheric models, leads to help understand regional carbon fluxes (Dolman et al., 2009). Therefore, confidence in our understanding of carbon cycle processes may be improved by a higher density of continuous measurement sites.

There are now over 400 regional stations monitoring atmospheric CO<sub>2</sub> under the Global Atmosphere Watch Programme (GAW) of the World Meteorological Organization (WMO) (<https://gawwis.meteoswiss.ch>). These sites capture more regional scale

information on fluxes than global stations, which reflect only well-mixed air mass. However, if technical measurement skill and data quality control are not sufficient, the data may not be useful to help identify and understand changes to the carbon cycle caused by climate change. Also, both measurement uncertainty and imperfect knowledge of the composition of background air can limit the precision of observation-based estimates of local or regional scale greenhouse gas enhancements (Graven et al., 2012; Turnbull et al., 2009, 2015).

Korea is important due to its location, where it is affected by flow from [East Asia the Asia Continent](#), especially China. Korea's atmospheric CO<sub>2</sub> monitoring history started at Tae-Ahn Peninsula (TAP, 36°44'N, 126°08'E, 20 m above sea level), in the west part of Korea, in 1990 with weekly flask-air samples as a part of the NOAA/CMDL/GMD Cooperative Global Air Sampling Network (<http://www.esrl.noaa.gov/gmd/ccgg/flask.php>). Studies demonstrated its regional characteristically high CO<sub>2</sub> was affected by China's industrial regions, while for CH<sub>4</sub> it was affected by Russian wetlands and local rice cultivation near TAP (Dlugokencky et al., 1993; Kim et al., 2014).

Since 1999, the Korea Meteorological Administration (KMA) has been monitoring atmospheric CO<sub>2</sub> at Anmyeondo (AMY, 36.53°N, 126.32°E, 46 m above sea level from a 40 m tower), about 28 km from TAP. Nevertheless, this was the first attempt to continuously monitor CO<sub>2</sub> in Korea. In 2012, KMA expanded its monitoring network to include data from the south-west (Jeju Gosan Suwolbong, JGS, 33.30°N, 126.16°E) and the east (Ulleungdo, ULD, 37.48°N, 130.90°E) parts of Korea to cover the whole peninsula for a better understanding of CO<sub>2</sub> sources and sinks. At the same time, all three monitoring stations started to use analyzers based on Cavity Ring Down Spectroscopy (CRDS; a different model at each station, Picarro, CA, USA) with the same measurement method. So far, even though measurements began in 1999 at AMY, there is no published description of methods used to measure and process the data from the three KMA sites.

~~In this paper, we present the CO<sub>2</sub> measurement such as sampling system, data quality and processing methods at those three KMA monitoring stations. The measurement uncertainties are calculated separately from the hourly, daily and monthly standard deviations, which include natural variability and measurement uncertainty. We analyze the characteristics of CO<sub>2</sub> at KMA stations during 2012 to 2016 and compare the data to other stations in East Asia: the global background WMO/GAW station in Waliguan (WLG, 36.28°N, 100.90°E, 3810 m), China, and Ryori (RYO, 30.03°N, 141.82°E, 260 m), which reflects global growth rates as a regional WMO/GAW station in Japan (Watanabe et al., 2000). In this paper, we present the measurement and sampling system, data quality and processing methods, and analyze the characteristics of CO<sub>2</sub> at those three KMA monitoring stations during 2012 to 2016. We calculate measurement uncertainties separately from the hourly, daily and monthly standard deviations, which include natural variability and measurement uncertainty. We compare the data to other stations in East Asia: the global background WMO/GAW station in Waliguan (WLG, 36.28°N, 100.90°E, 3810 m), China, and Ryori (RYO, 30.03°N, 141.82°E, 260 m), which reflects global growth rates as a regional WMO/GAW station in Japan (Watanabe et al., 2000). In addition, we present 15 years of long-term CO<sub>2</sub> measurements in East Asia, including those from AMY. Furthermore, this paper will serve a reference for KMA data archived at the World Data Centre for Greenhouse Gases.~~

## 2. Experiment

### 2.1 Sampling sites

The locations of Anmyeondo (AMY), Jeju Gosan Suwolbong (JGS), and Ulleungdo (ULD) stations are shown in Fig. 1 with their details summarized in Table 1.

AMY is located in the west part of Korea, about 130 km southwest from the megacity of Seoul. Within a 100 km radius, the semiconductor industry and relevant industries exist. Also, the largest thermal power plants fired by coal and heavy oil in Korea are within 35 km to the north-east and south-east of the station. Local activity is related to agriculture, such as rice paddies, sweet potatoes and onions, while the area is also known for its leisure opportunities during summer. The west and south side of AMY is open to the sea and along the coast, there is a large tidal mudflat with many pine trees.

JGS is located in the west part of Jeju Island, which is the biggest volcanic island (1,845.88 km<sup>2</sup>) in the south-west of Korea and about 90 km from the mainland. Jeju is popular for tourists regardless of the season, while the region of Suwolbong is famous as a Global Geo-park due to the outcrops of volcanic deposits exposed along the coastal cliff where JGS is located. Next to JGS there is a wide plain where mainly potatoes, garlic and onions are harvested. In Jeju, there are two major power plants fired by heavy oil at approximately 47 km north-east and 16 km south-east from the stations. The side of the station from south-west to north-west is open to the sea, where there are volcanic basalt rocks. The sea to the south is connected to the East China Sea and the sea to the west is linked to the Yellow Sea. Next to JGS there is a wide plain where mainly potatoes, garlic and onions are harvested.

ULD is located in the east part of Ulleung Island, which is in the east part of Korea and about 155 km from the mainland. In south-east area of Korea Peninsula, there are very famous cities for steel, chemical, and petrochemical industries along the coast line and those cities are located about 200 – 250 km south-west from the island. Ulleung Island is 72 km<sup>2</sup>, volcanic origin, and the rocky steep-sided island with top of a large stratovolcano reaching a maximum elevation of 984 m. This peak is located at north-west of ULD is on the west slope of a hill, it is mainly affected by airflow up over the hill from the south west, not from the town in the valley. The island has There are a few small mountains whose heights are about 500 to 960 m a.s.l., within 5 km to the north and south-east of the station. Due to those geological features, ULD is mainly affected by airflow up over the hill from the south-west and downslope winds from north-east. There is also a small town in the valley northeast of the station with a small port, which is 810 m away from the ULD station. Since ULD is on the west slope of a hill, it is mainly affected by airflow up over the hill from the south west, not from the town in the valley. In the south-west area, there is a small brickyard 200 m from the ~~station~~ULD. Farming and fishing industries are very active on the island, though there is no farm in the southern area of the island near ULD. An automatic weather station (AWS) was installed at AMY near the inlet, and 10 m above the station at JGS and ULD, but separate from the air inlet tower.

## 2.2 Measurement system: Inlet, drying system and instrument

The measurement system consists of three main parts: inlet, drying system and instruments (Fig. 2). The intake is an inverted stainless steel box (15 cm (W) x 25 cm (D) x 30 cm (H)) with a stainless steel filter (D 4.7 cm, pore size 5 μm) mounted on a plastic mesh holder and connected to the Dekabon sampling tubing (Nitta Moore 1300-10, I.D 6.8 mm, O.D 10 mm). Over times longer than one month, a significant pressure drop occurs between the inlet and the pump, so the filter is replaced monthly.

Sample air is dried with a system that has a cold trap (CT-90, Operon, Korea), which is connected to the pump (KNF N145.1.2AN.18, Germany, 55 L/min, 7 bar in AMY; KNF N035AN.18, Germany, 30 L/min, 4 bar in JGS and ULD). The cold trap is set to – 80 °C and keeps its temperature. When the sample air comes from outside into the drying system, the inner temperature increases. Therefore ambient is cooled down to – 20 °C in the first chamber, and then to – 50 °C in the second chamber. To increase dehumidification efficiency, the second chamber is filled with stainless steel beads (Fig. 2). The cold trap

~~can cool to -90 °C, however, it is set to -80 °C so the real temperature of the inner air flow is -50 °C according to our experiment. When the cold trap is turned on, the air move through a first chamber which drops it to -20 °C, and then to a second chamber that cools it to -50 °C. To increase dehumidification efficiency, the second chamber is filled with stainless steel beads (Fig. 2).~~

5 Each trap is employed drying ambient air for 24 ~~hours~~ while the other is warmed and drained. The dehumidification and water drain sequence is as follows: (step 1) pump/cold trap A is employed to dry ambient air for 24 hours (step 2) pump/cold trap B turn off to melt ice at ambient temperature for 20 hours (step 3) pump B turns on to pressurize and water drain for 2 hours (step 4) cold trap B turns on and cools to operating temperature for 2 hours (step 1) pump/cold trap B are employed drying ambient air. The difference between this system and a typical cryogenic one is that it was designed with a dual mode, with one trap drying while water is automatically drained from the other. Therefore it avoids the cold trap impinger clogging during long-term, unattended monitoring. This drying system was developed by KMA and Korea Research Institute of Standards and Science (KRISS) in 2011 for the remote monitoring stations so that it can be easily accessed remotely.

10 Even though the H<sub>2</sub>O monitored by CRDS was not calibrated, hourly mean H<sub>2</sub>O through the drying system is 0.004 ± 0.005% at AMY, 0.001 ± 0.002% in JGS and 0.001 ± 0.004% in ULD during 2012 to 2016. Laboratory standard gases prepared by the Central Calibration Laboratory (CCL), which is operated by the National Oceanic and Atmospheric Administration, Global Monitoring Division in Boulder, Colorado, USA, typically contain less than 0.0001% H<sub>2</sub>O ([www.esrl.noaa.gov/gmd/ccl/airstandard.html](http://www.esrl.noaa.gov/gmd/ccl/airstandard.html)). When we sampled them directly to CRDS without this drying system, mean H<sub>2</sub>O (10 min average) was 0.0009% regardless of the CO<sub>2</sub> level across the KMA monitoring stations.

15 For example, when there is a difference in H<sub>2</sub>O at AMY between laboratory standard gases and ambient samples of 0.003%, this creates a small bias of 0.012 ppm on 400 ppm CO<sub>2</sub> according to the equation suggested by Rella et al. (2013):

$$\frac{C_{dilution}}{C_{dry}} = 1 - 0.01H_{act} \quad (1)$$

25 where  $C$  is the CO<sub>2</sub> mole fraction and  $H_{act}$  is the actual water mole fraction (in %). Since working standards showed almost same level of H<sub>2</sub>O to laboratory standards through the CRDS, we considered the CO<sub>2</sub> mole fraction dilution offsets between calibration standards and sample air when the uncertainty was estimated (sect 3.1).

30 After the drying system, ambient air flows through the 1/8" (o.d.) stainless steel tubing to an 8 port multi-position valve (VICI), which selects among standard gases and ambient air. A leak test of all lines is performed every month. CRDS is well-known for its highly linear and stable response (Crosson, 2008). [A model G2301 \(Picarro, USA\) was installed in Oct, 2011, and it became our official CO<sub>2</sub> measurement at AMY starting January 1, 2012. Picarro models G1301 and G2401 have been used to measure ambient CO<sub>2</sub> and CH<sub>4</sub> since January 1 and February 12 in 2012, at JGS and ULD, respectively. Those analyzers monitor CO<sub>2</sub> every 5 sec across the KMA Greenhouse Gas \(GHG\) network.](#)

35 At AMY, a non-dispersive infrared analyzer ([NDIR](#), Ultramat 6, Siemens, Germany) was used to monitor atmospheric CO<sub>2</sub> every 30 sec from February 1, 1999 to December 31, 2011. ~~During the period, we had three step dehumidification system, 1) -4 °C cold trap 2) nafion and 3) Mg(ClO<sub>4</sub>)<sub>2</sub>, before installing the new system. A model G2201 (Picarro, USA) was installed in Oct, 2011, and it became our official CO<sub>2</sub> measurement at AMY starting January 1, 2012. Picarro models G1301 and G2401 have~~

~~been used to measure ambient CO<sub>2</sub> and CH<sub>4</sub> since January 1 and February 12 in 2012, at JGS and ULD, respectively. Those analyzers monitor CO<sub>2</sub> every 5 sec across the KMA network.~~

## 2.3 Calibration, quality control and data processing

### 2.3.1 Calibration method

The metrological definition of calibration is followed: operation that, under specified conditions, in a first step, establishes a relation between the quantity values with measurement uncertainties provide by measurement standards and corresponding indications with associated measurement uncertainties and, in a second step, uses this information to establish a relation for obtaining a measurement result for an indication (JCGM, 2012).

After starting to operate KMA GHG network in 2012, we calibrate our instruments against WMO-X2007 scale with our working standards. Our standard hierarchy consists of the laboratory standards from CCL, which are the highest rank in our network ([https://www.empa.ch/web/s503/gaw\\_glossary](https://www.empa.ch/web/s503/gaw_glossary)), and working standards that are certified by the laboratory standards. 4 laboratory standards are prepared from 360 to 480 ppm with the uncertainty of  $\pm 0.070$  ppm (Zhao et al., 2006). Since AMY is a central lab for the GHG network, working standards used at three stations are filled and certified by laboratory standards with CRDS for CO<sub>2</sub> dry mole fraction at AMY. We have 4 working standards at each station from 360 to 460 ppm at inter vals of 30 – 40 ppm with the uncertainty of  $\pm 0.088$  ppm after transferring the scale. This value is also used as the scale propagation factor of the measurement uncertainty in section 3.1.

Our ability to maintain and propagate the WMO-X2007 scale was shown through the 6<sup>th</sup> Round Robin comparison of standards hosted by the CCL ([https://www.esrl.noaa.gov/gmd/ccgg/wmorr/wmorr\\_results.php](https://www.esrl.noaa.gov/gmd/ccgg/wmorr/wmorr_results.php), the difference of low level was  $0.03 \pm 0.04$  ppm while  $0.04 \pm 0.06$  ppm for high CO<sub>2</sub>), a comparison of continuous measurements with the traveling instrument of the World Calibration Centre (WCC-Empa, 2017(a), (b) and 2014.), and a co-located comparison of discrete samples collected at AMY and analyzed by NOAA/ESRL with our in situ analyzer results. This ongoing comparison between level 1 (L1) hourly data from the CRDS and weekly flask-air samples collected at AMY has been implemented since December, 2013. The mean difference between flask minus in situ is  $-0.11 \pm 2.32$  ppm from 2014 to 2016, close to GAW's compatibility goal for CO<sub>2</sub> in the Northern Hemisphere ( $\pm 0.1$  ppm) (Fig 3).

The analyzers are calibrated every two weeks; all 4 working standard gases are sampled by CRDS for 40 min. The first 30 min of each cylinder run are rejected and 10 min are used for the calibration of CO<sub>2</sub> to ensure instrument stabilization. 4 standards are adequate to determine CO<sub>2</sub>, as indicated by mean residuals of  $0.0003 \pm 0.026$  ppm from a linear function fitted to the measurements of standards. Calibration connects analyzer response to the WMO-X2007 scale, and also tracks drift in the analyzer. The drift of the CRDS over two weeks is negligible indicating the mean values were  $\sim 0.006$  ppm at AMY,  $\sim 0.001$  ppm at JGS and  $\sim -0.019$  ppm at ULD respectively. Therefore the calibrations are applied a stepwise change fortnightly.

When we started monitoring atmospheric CO<sub>2</sub> with NDIR at AMY, it was calibrated every 2 hours with 4-point calibration tanks against KRISS scale from 1999 to 2011 Dec. During this period, we had used the cylinders which were certified by KRISS directly without working standards. KRISS and WMO scales agreed well in CCOM-P41 organized by the International Bureau of Weights and Measures (BIPM) ([www.bipm.org/utis/common/pdf/final\\_report/QM/P41/CCQM-P41\\_part1.pdf](http://www.bipm.org/utis/common/pdf/final_report/QM/P41/CCQM-P41_part1.pdf)).

서식 있음: 글꼴: (영어) Times New Roman, (한글) Times New Roman, 글꼴 색: 자동, 영어(영국)

~~Analysts are calibrated every two weeks with 4 standard gases from 360 to 460 ppm at intervals of 30–40 ppm. Since AMY is a central lab for the KMA Greenhouse Gas (GHG) network, working standards used at JGS and ULD are filled at AMY and calibrated for CO<sub>2</sub> dry-air mole fractions traceable to the WMO X2007 scale. AMY directly calibrates its instrument with laboratory standards certified by the CCL. Laboratory standards have an uncertainty of ± 0.02 ppm and the uncertainty of working standard is ± 0.05 ppm after transferring the scale. This value is also used as the scale propagation factor of the measurement uncertainty in section 3.1. When the scale is propagated and an instrument is calibrated, all 4 cylinders are sampled by CRDS for 40 min. The first 30 min of each cylinder run are rejected and 10 min are used for the calibration of CO<sub>2</sub> to ensure instrument stabilization. Calibration connects analyzer response to the WMO X2007 scale, and also tracks drift in the analyzer. The drift of the CRDS over two weeks is normally within ± 0.1 ppm for all KMA stations while 4 standards are adequate to determine CO<sub>2</sub>, as indicated by mean residuals of 0.0003 ± 0.026 ppm from a linear function fitted to the measurements of standards. Our ability to maintain and propagate the WMO X2007 scale was shown through the 6th Round Robin comparison of standards hosted by the CCL ([https://www.esrl.noaa.gov/gmd/cegg/wmorr/wmorr\\_results.php](https://www.esrl.noaa.gov/gmd/cegg/wmorr/wmorr_results.php)), a comparison of continuous measurements with the traveling instrument of the World Calibration Centre (WCC Empa, 2017(a), (b) and 2014.), and a co-located comparison of discrete samples collected at AMY and analyzed by NOAA/ESRL (Fig. 3) with our in situ analyzer results. This ongoing comparison between level 1 (L1) hourly data from the CRDS and weekly flask air samples collected at AMY has been implemented since December, 2013. The mean difference between flask minus in situ is -0.11 ± 2.32 ppm from 2014 to 2016, close to GAW's compatibility goal for CO<sub>2</sub> in the Northern Hemisphere (± 0.1 ppm) (Fig 3).~~

### 2.3.2 Data quality control process

All data are monitored, collected and stored at the Environmental Meteorological Research Division (EMRD), National Institute of Meteorological Sciences (NIMS) in Jeju, Korea. Raw data based on 5 second intervals are processed two ways: 1) auto flagging and 2) manual flagging. Auto flagging identifies instrument malfunction and instrument detection limit of CO<sub>2</sub>. Auto flags are assigned when our algorithm detects deviations from prescribed ranges for analyser engineering data.

Acceptable values for the parameters related to instrument function are: H<sub>2</sub>O (%) < 0.02; 139.95 < cavity pressure (Torr) < 140.05; and 44.99 < cavity temperature (°C) < 45.01. H<sub>2</sub>O > 0.02% indicates periods when the drying system had problems or a leak in the gas line occurred, while the ranges of cavity pressure and temperature were suggested by the manufacturer. Instrument measurement range is based on the calibration range, from 360 to 460 ppm at 30 - 40 ppm intervals. Therefore flags are assigned when CO<sub>2</sub> is outside this range. ~~In the case when CO<sub>2</sub> is greater than 500 ppm, values are considered invalid, since a leak in a sample line or pump diaphragm causes measurement of room air.~~

Manual flags are assigned by technicians at each station according to the logbook based on: inlet filter exchange, diaphragm pump error, low flow rate, dehumidification system error, calibration periods, experimental periods such as participation in comparison experiments, observatory environmental issue such as construction next to a station, extreme weather, or other issues related to the instrument. These codes refer to definitions by the World Data Centre for reactive gases and aerosols maintained by EBAS for the GAW Programme (<http://www.nilu.no/projects/ccc/flags/flags.html>) and were modified for the Korea network. Data with flags are reviewed by scientists at the EMRD, and valid data are selected as Level 1 (L1).

### 2.3.3 Regional background selection method

~~L1 data include local and long range transported pollution by human and/or biotic activities.~~ ~~L1 data include local pollution by human and/or biotic activities.~~ Therefore, only those data that represent non-polluted and well-mixed air should be selected for analysis on a regional scale. The data are selected ~~as-for~~ background when they meet the following conditions: 1) Hourly averages are calculated when there are at least 60 30 sec measurements from the NDIR and at least 300 5 sec measurements from the CRDS, 2) the hourly average of level 1 has a standard deviation less than “A”, 3) and the differences between consecutive hourly averages are less than “B”. A and B were determined empirically and are equal. We determined 1.8 ppm for AMY, 1 ppm for JGS, and 0.8 ppm for ULD. This process selects 55% to 60% of the data at each station, and they are defined as Level 2 (L2) hourly data. To calculate daily averages (L2 daily), at least 6 L2 hourly data are required. ~~Finally the smoothed curves fitted to L2 daily data is calculated with methods by Thoning et al. (1989) to represent the regional baseline as reducing noise due to synoptic-scale atmospheric variability and measurement gaps.~~ Fig. 3 shows L1 hourly data, L2 daily data, and the smoothed curves fitted to L2 daily data ~~calculated with methods by Thoning et al. (1989).~~

## 3. Results and Discussion

### 3.1 Measurement uncertainty

Variability in CO<sub>2</sub> observed at KMA’s stations includes contributions from natural atmospheric variability and variability related to the air handling and measurement procedures. Natural atmospheric variability is represented, for example, by the standard deviation of all measurements contributing to a time-average, after the contribution of experimental noise is accounted for. Here we develop methods to calculate practical realistic measurement uncertainties. Based on measurements of target cylinders and a co-located comparison of measurements at AMY, we assume systematic biases are negligible. According to the previous studies, the total measurement uncertainty consists of multiple uncertainty components (Andrews et al., 2014, Verhulst et al., 2017). However, in this paper, we assess the measurement uncertainty based on the following components:

$$(U_T)^2 = (U_{h_2o})^2 + (U_P)^2 + (U_r)^2 + (U_{scale})^2 \quad (2)$$

where  $U_T$  is the total measurement uncertainty in the reported dry-air mole fractions;  $U_{h_2o}$  is the uncertainty from the drying system;  $U_P$  is repeatability;  $U_r$  is reproducibility; and  $U_{scale}$  the uncertainty of propagating the WMO-XCO<sub>2</sub> scale to working standard gases.

$U_{h_2o}$  is computed from the differences in H<sub>2</sub>O (%) between the ambient airstream through the drying system and standard gases injected directly, bypassing the drying system. According to the GAW recommendation, the standard gases should be treated through the same system to air sample (WMO, 2016). However, our drying efficiency is not constant so that we injected standard gases directly as a reference value. Here, we define H<sub>2</sub>O from the standard gases as 0.0009%. This value has been constant and stable during 2012 to 2016. On the other hand, the drying system efficiency is not constant so this uncertainty component is time dependent. Eq.(1) was applied for this factor where  $H_{act}$  is the difference between H<sub>2</sub>O in samples and standard gases (0.0009%). Hourly CO<sub>2</sub> dilution offsets range from -0.05 to 0.09 ppm at AMY, -0.02 to 0.07 ppm at JGS and -0.05 to 0.08 ppm at ULD during 2012 to 2016. Since positive and negative values are found, we use following equation:



$$U_x = \sqrt{\frac{\sum_{i=1}^N (x_i)^2}{N}} \quad (3)$$

where  $U_x$  represents  $U_{h2o}$ ;  $x$  is the hourly  $CO_2$  dilution offsets from Eq(1);  $N$  is the total number of hourly mean values.  $U_{h2o}$  is tabulated for each station in table 2.

$U_p$  is determined from the standard deviations of working standard measurements, as described in section 2.3.1 and expressed by a pooled standard deviation

$$U_p = \sqrt{\frac{\sum_{i=1}^N N_i \times S_i^2}{N_i - N_t}} \quad (4)$$

where  $S_i$  is the standard deviation of 10 min averages of working standard measurements;  $N_i$  the number of data during 10 minutes (based 5 sec intervals); and  $N_t$  is the total number of calibrations during the period.  $S_i$  varied from 0.02 to 0.09 ppm at AMY, 0.02 to 0.07 ppm at JGS and from 0.01 to 0.05 at ULD. The pooled standard deviations ( $U_p$ ) are shown in table 2.

$U_r$  is the drift occurring between two-weekly calibration episodes, which was mentioned in section 2.3.1. We determined it as the differences in  $CO_2$  measured from cylinders with subsequent calibrations over two weeks. It ranged from -0.08 to 0.1 ppm at AMY, -0.07 to 0.09 ppm at JGS and -0.16 to 0.11 ppm at ULD. We expressed  $U_r$  as the standard deviation of all drift values during the experimental period using Eq (3), where  $U_x$  represents  $U_r$ ;  $x$   $\Delta CO_2$  during 2 weeks; and  $N$  is the total number of data. They are tabulated with other uncertainty terms by site in table 2.

According to the Zhao et al.,(2006) the uncertainty of working standards can be calculated by the propagation error arising from the uncertainty of primaries with maximum propagation coefficient ( $\gamma = 1$ ) and repeatability. ~~Similarly~~ Similarly  $U_{scale}$  for working standard is determined by

$$U_{scale} = \sqrt{U_p^2 + U_{lab}^2} \quad (4)$$

where  $U_{lab}$  is the uncertainty of laboratory standards, which CCL (NOAA/ESRL) certified. Here,  $U_{lab}$  ~~is~~ has the same value ~~to~~ as the uncertainty of Secondaries, 0.070 ppm, in the one-sigma absolute scale. These values are the same for all stations since they are calibrated by a central lab in AMY. Therefore  $U_p$  is the repeatability at AMY since we propagate the standard scale through the same analyzer and set-up for the atmospheric monitoring.

~~In the future, quote uncertainties could be greater due to including more error sources. Repeatability and reproducibility may become more precise with improvements in technologies and methods. In the future those uncertainties can be greater than now as including more error sources. And also repeatability and reproducibility can be more precise as reflecting variation depending on time.~~

### 3.2 CO<sub>2</sub> data from 2012 to 2016 at KMA's three monitoring stations

The L1 hourly data, L2 daily data and smoothed curves fitted to L2 daily data are shown in Fig. 3. Episodes of elevated CO<sub>2</sub> were often observed at AMY, with a mean difference between maximum and minimum L1 hourly values in a year of  $\sim 102.1 \pm 12.1$  ppm; for the other sites, maximum minus minimum values were  $\sim 62.5 \pm 9.2$  ppm at JGS, and  $\sim 55.1 \pm 9.6$  ppm in ULD. The enhancement relative to the local background mole fraction helps evaluate local additions of CO<sub>2</sub>, with the excess signal defined as:

$$\text{CO}_{2\text{XS}} = \text{CO}_{2\text{OBS}} - \text{CO}_{2\text{BG}}$$

~~Where CO<sub>2OBS</sub> is L1 hourly data and CO<sub>2BG</sub> indicates regional background at the site, determined from the smoothed curve fitted to L2 daily data (section 2.3.3). When we roughly analyzed the foot prints for hourly CO<sub>2XS</sub> at three stations, the potential source region was considered as not only Korean Peninsula but also from northern-eastern China (KMA, 2014). This happens due to synoptic system that developing low pressure over the source regions provide uplift the pollutions into the free troposphere and make them descent to downwind area (Tohjima et al., 2010, Tohjima et al., 2014, Lee et al., 2016).~~

~~Where CO<sub>2OBS</sub> is L1 hourly data and CO<sub>2BG</sub> indicates local background at the site, determined from the smoothed curve fitted to L2 daily data (section 2.3.3).~~ Monthly mean CO<sub>2XS</sub> at AMY was  $4.3 \pm 3.3$  ppm, with  $1.7 \pm 1.3$  ppm at JGS and  $1.0 \pm 1.9$  ppm at ULD during 2012 to 2016. As described in section 2.1, since there are a lot of local activities around AMY, the mean value is larger than at other stations. It was assumed that CO<sub>2XS</sub> is greater in winter compared to other seasons since photosynthesis is not active and respiration is diminished while anthropogenic sources such as residential sectors would dominate. However, all three stations showed highest CO<sub>2XS</sub> in summer (JJA); it was  $6.3 \pm 4.9$  ppm at AMY,  $2.8 \pm 1.4$  ppm at JGS and  $1.6 \pm 2.7$  ppm at ULD. Meanwhile the smallest CO<sub>2XS</sub> was during spring (MAM) at AMY with  $2.8 \pm 1.5$  ppm, and during winter (DJF) at JGS and ULD with  $0.9 \pm 0.5$  ppm and  $0.4 \pm 0.4$  ppm respectively. Even though the ~~baseline-selected~~ data, which agree with the conditions given in 2.3.3, accounted for 55% to 60% of total data, the percentages are different according to the seasons. For example, during summer they decreased to 46% at AMY, 43% at JGS and 34% at ULD, meanwhile they account for 61% - 75% at all stations during winter. ~~This means that s~~Since Korea Peninsula is affected by Siberian high from winter to spring with strong westerly wind, CO<sub>2OBS</sub> was measured in well mixed air relative to summer. Also, the ~~wind speed decreased and~~ diurnal variation increased during summer, so ~~this statistical selection method is limited~~ CO<sub>2OBS</sub> might reflect local/regional sources and sink more ~~than other seasons~~. We also discuss this issue in sections 3.3 and 3.4.

### 3.3 Local/regional effects on observed CO<sub>2</sub>

To understand the influence of local surface wind on observed CO<sub>2</sub>, bivariate polar plots were used. These plots are expressed by dependence of all hourly CO<sub>2</sub> mole fractions (~~L1 data~~) on wind direction and speed in 2016 (Fig. 4 to 6). ~~The wind data are derived from AWS which was described in section 2.1. We divided data into two groups: a) selected hourly baseline data (L2 hourly data) from L1 hourly data with conditions suggested in section 2.3.3 (Fig 4 6, left panel) and b) remaining data after baseline selection (L1 minus L2 hourly data) (Fig 4 6, right panel). An automatic weather station (AWS) was installed at AMY near the inlet, and 10 m above the station at JGS and ULD, but separate from the air inlet tower.~~

At AMY, ~~lower baseline~~CO<sub>2</sub> from autumn to winter occurred when winds mainly come from 315° to 360°. In spring, ~~lower baseline~~CO<sub>2</sub> started to include winds from 180° to 225° and the dominant ~~baseline~~wind direction shifted to the south (180° to

225°) in summer, indicating that ~~baseline-lower~~ CO<sub>2</sub> is linked to air masses from the sea (Yellow Sea). However, when wind speed is less than 5 m·s<sup>-1</sup>, CO<sub>2</sub> is elevated in all seasons ~~and even in the sea-side.~~ Especially in summer, this condition (wind speed < 5 m·s<sup>-1</sup>) accounts for 80% of total data as indicating this might enhance CO<sub>2XS</sub> in section 3.2. This also suggests that the high CO<sub>2</sub> can be observed in the air mass transported from not only Korea mainland but also west regions from western parts of Yellow sea.

JGS observed the strongest winds among the three stations for all seasons, with wind speed >7 m·s<sup>-1</sup> occurring almost 36% of the time and a maximum speed up to ~40 m·s<sup>-1</sup>. ~~Baseline-Lower~~ CO<sub>2</sub> was observed with winds from 315° to 340° (Yellow Sea) and 120° to 160° (East China Sea) with wind speed > 5 m·s<sup>-1</sup> ~~regardless of seasons~~. In contrast, JGS is contaminated with local CO<sub>2</sub> emissions when wind comes from 45° to 135° with wind speed ≤ 5 m·s<sup>-1</sup>. Since National Geo Park is east of the station, JGS could be affected by tourist activities such as transportations. The station is surrounded by farm lands so that it also could be affected by farming activities such as burning trashes and fields. During the period from autumn to winter, Hhigh CO<sub>2</sub> was also ~~often~~ observed with even strong wind, especially in Yellow sea side.

For ULD, the main wind directions are quite clearly from 0° to 90° (30%) and from 180° to 270° (33%), and wind speed less than 5 m·s<sup>-1</sup> occurs 72% of the time. ~~Since ULD is located on the west slope of a hill, it is only affected by downslope winds from the top of the hill with a northeast direction and upslope winds with a southwest direction.~~ Normally ~~baseline-lower~~ CO<sub>2</sub> is monitored regardless of wind direction and wind speed. High CO<sub>2</sub> episodes were mainly observed when the wind sector was between 180° to 225°, presumably affected by the the-brickyard, 200 m from the station industry complex located in south -east part of Korea Peninsula and the brickyard, 200 m from the station. This wind direction is very dominant in summer with lower wind speed than other seasons.

Overall, both stations on the west side of Korea, AMY and JGS, might be more affected by continental air mass so their observations contain information about its sources and sinks, while they are also affected by local activities. Overall, both stations on the west side of Korea, AMY and JGS, are downwind from East Asia so their observations contain information about its sources and sinks when observing baseline CO<sub>2</sub>, while they are also affected by local activities under stagnant conditions. Our eastern station, ULD, reflects ~~baseline-lower~~ CO<sub>2</sub> ~~more~~ than other two stations with limited local activities. And it was also suggested that data from regional GAW stations have complex information, so it is necessary to develop a selection method for baseline conditions to better understand regional characteristics.

### 3.4 Average diurnal variation

Diurnal CO<sub>2</sub> variations, calculated as the average departure from the daily mean, in April, August, November and January, are used to represent the average diurnal variations in spring, summer, autumn and winter over 5 years in Fig 7. The standard deviations of the hourly means are ~ 16 ppm, ~ 7 ppm and ~ 5 ppm in AMY, JGS and ULD in January, April and November, but increased in August to ~ 20 ppm, ~10 ppm and ~ 8 ppm at AMY, JGS and ULD, respectively.

Prior studies described that diurnal variations can be influenced by atmospheric rectifier that is covariance between terrestrial ecosystem metabolism, such as an intensity of photosynthesis and a density of vegetation, and vertical atmospheric transports (Denning et al. 1999; Chan et al., 2008) Many factors, such as the intensity of photosynthesis, density of vegetation and the degree and speed of atmospheric mixing, influence the diurnal fluctuations in atmospheric CO<sub>2</sub> (Pales and Keeling, 1965; Inoue and Matsueda, 1996). Generally, rapid growth of turbulence at the surface after sunrise results in a high boundary layer and leads to decreased CO<sub>2</sub> measured at the station during daytime, while CO<sub>2</sub> accumulates in a stable nocturnal boundary layer created by

a temperature inversion due to surface radiative cooling during the night (Higuchi et al., 2003). Also, the diurnal cycle in summer is the result of a combination of several factors, including active photosynthesis.

AMY and JGS showed those typical characteristics during all seasons, even though the differences between minimum and maximum CO<sub>2</sub> values significantly varied with month. However, ULD had this trend only in summer while other seasons showed very steady values through the day.

At AMY, the differences between maximum and minimum values were 13.5 ppm and 6.9 ppm in August and November, respectively, while those values were around 3 ppm in other seasons. This trend is very typical, as mentioned above. For JGS, those values were observed in the order of 9.6 ppm > 3.3 ppm > 2.8 ppm > 0.88 ppm in August, April, November and January, respectively. During summer, both AMY and JGS show an afternoon plateau in CO<sub>2</sub> from around mid-afternoon due to the combination of changes in the photosynthetic rate and increased boundary layer before sunset. In the evening CO<sub>2</sub> increases again when respiration dominates and the boundary layer becomes neutral or stable. Those two stations also show the clear wind pattern such as land-sea breeze which might enhance the CO<sub>2</sub> diurnal cycle in summer.

In contrast, at ULD, an average diurnal cycle was only obvious in August (peak to peak value of 3.9 ppm) and CO<sub>2</sub> increased monotonically during the afternoon 3.9 ppm, meanwhile, ~~CO<sub>2</sub> increased without a period of constant CO<sub>2</sub> during the afternoon seen at the other two stations. In other seasons, diurnal variations were 0.5-1 ppm.~~

~~For ULD the wind has no diurnal pattern differently from other two stations, however, come from certain sectors regardless of time, which we mentioned in section 2.1 and 3.3. ULD, at 221 m, is higher than AMY and JGS, so that it is less affected by local activities. Those geological characteristics lead steady values at ULD except for summer that the most active photosynthesis.~~

~~At night time, ULD has downslope winds because the radiative cooling of the hill leads air to flow down the slopes of the station while daytime warming brings the air from the lower slopes of the hill. ULD, at 221 m, is higher than AMY and JGS, so that it is hardly affected by vegetation, but it depends on wind direction according to the mountain and valley breezes. In other seasons, diurnal variations were 0.5-1 ppm.~~

### 3.5 Seasonal cycle and growth rates in East Asia

Seasonal variations from KMA's three stations and two other stations, WLG and RYO in East Asia, are compared in Fig. 8. WLG flask-air data from NOAA/ESRL/GMD and quasi-continuous measurements at RYO by Japan Meteorological Agency, which were downloaded from the World Data Centre for Greenhouse Gases (WDCGG), were fitted with smoothed curves and compared to KMA observations. It is known that the seasonal cycle of atmospheric CO<sub>2</sub> at surface observation stations in the Northern Hemisphere is driven primarily by net ecosystem production fluxes from terrestrial ecosystems (Tucker et al., 1986, Fung et al., 1987, Keeling et al., 1989). The averaged seasonal amplitude from 2012 to 2016 was smallest at WLG with 12.2 ± 0.9 ppm and largest at AMY with 15.4 ± 3.3 ppm. For JGS and RYO, peak to peak amplitudes were similar at 13.2 ± 1.7 ppm and 13.5 ± 1.6 ppm, whereas it was 14.2 ± 3.1 ppm at ULD (Table 3).

Normally, maximum CO<sub>2</sub> appears ~~between from~~ 4.8 ppm at JGS to 5.8 ppm at AMY in April while the minimum appears in August between -6.8 at WGL to -9.6 ppm at AMY according to the station. The highest maximum and lowest minimum mean value appeared at AMY indicating that even though AMY is located at similar latitude as these other stations, it seems to capture photosynthetic uptake and respiration release of CO<sub>2</sub> by terrestrial ecosystems more than others. Also atmospheric CO<sub>2</sub> at AMY includes added anthropogenic emissions transported ~~from East Asia~~ through the Yellow sea from the Asia Continent as explained in section 3.2 and 3.3. Meanwhile WLG is hardly affected by vegetation due to its altitude (Table 1).

The annual growth rate of CO<sub>2</sub> which was computed by the increase in annual means of de-seasonal trends from one year to the next at KMA sites, was quite similar to other East Asian stations and to the global growth rate from WMO (Fig.8 (b)). From 2012 to 2016, the average annual increase observed at all stations in East Asia was between  $2.4 \pm 0.7$  and  $2.6 \pm 0.9$  ppm/yr.

~~This mean value is similar to the global increase of 2.21 ppm/yr from 2007 to 2016 reported by WMO (This value is determined by the absolute differences from previous year) This mean value is greater than 1.7 ppm from 1988 to 1998 reported by RYO and is similar to the global increase of 2.21 ppm/yr from 2007 to 2016 reported by WMO (This value is determined by the absolute differences from previous year).~~ The large increase in 2016 and 2015 was due to increased natural emissions of CO<sub>2</sub> related to the most recent El Niño event (Betts et al., 2016). Averaged annual CO<sub>2</sub> was highest at AMY and lowest at WLG among East Asian stations listed in Table 3, which shows that their differences are  $8.5 \pm 0.7$  ppm. ~~The low growth rate in 2014 at ULD might be caused from no significant annual differences between 2013 and 2014 although the reasons are still unclear. Further studies are necessary to fully understand those results.~~

~~Since CO<sub>2</sub> is long-lived atmospheric species, the growth rate should be similar between the stations in the same region, even if they are subject to different combinations of anthropogenic and biogenic fluxes. Since the residence time of CO<sub>2</sub> is long enough in the atmosphere, the growth rate should be similar between the stations even though their levels are different according to those scales and locations.~~ However, our long term trends comparison showed that measurement and environmental changes also effected on its growth rate.

The long-term trends of CO<sub>2</sub> mole fractions at AMY, WLG and RYO from 2002 to 2016, which were extracted by the method of Thoning et al. (1989), are shown in Figure 9. The trends of CO<sub>2</sub> at WLG and RYO increased in parallel, whereas AMY increased with a similar slope but with larger fluctuations than the other stations. Especially the negative growth rate, which was only observed in northern high latitude in 1992 due to Mount Pinatubo eruption, was recorded in 2004 and 2006 at AMY, while high growth rate was recorded in 2012 without ENSO (WDCGG, 2017; Stenchikov et al., 2002; Heimann and Reichert, 2008).

In July 2004, the inlet height at AMY was changed from 20 m to 40 m above ground (Table 1); observed CO<sub>2</sub> mole fractions before moving the inlet height reflected more influence from local activities that affected the long-term trend (Song et al., 2005). According to the log book, in 2005 AMY was under the construction to expand the space with a new building that the instrument showed ~~unstable-strong and highly localized~~ signals during the period.

~~The measurement system such as instruments, drying systems and standard scale were changed in 2012 as described in section 2.2 and 2.3.1. The measurement system was changed in 2012. An NDIR was used to monitor atmospheric CO<sub>2</sub> from 1999 with a three step dehumidification system, 1) -4°C cold trap 2) nafion and 3) Mg(ClO<sub>4</sub>)<sub>2</sub>, before installing the new system in Oct. 2011 as described in section 2.2.~~ It was proved that the CRDS has higher precision measurements than NDIR, and there were CO<sub>2</sub> offsets in a comparison between the two instruments (Chen et al., 2010; Zellweger et al., 2016). ~~The maintaining traceability to the primary standard of the same scale under the GAW Programme would be more incentive to assure the long-term consistency (WMO, 2017).~~

~~Standard scale was also changed at the same time; KRISS scale was used during the NDIR period and then changed to WMO X2007 scale with the new system. KRISS and WMO scales agreed well in CCQM P41 organized by the International Bureau of Weights and Measures (BIPM) (www.bipm.org/utls/common/pdf/final\_report/QM/P41/CCQM\_P41\_part1.pdf). However, maintaining traceability to the primary standard of the same scale under the GAW Programme would be more incentive to assure the long-term consistency (WMO, 2017).~~

This result suggests that factors not only related to local sources/sinks, but also environmental changes around stations and level of technical skill are very important to monitor regional background CO<sub>2</sub> over the long term. ~~On the other hand, on-going comparisons of measurements at co-located sites and for the same species, such as between discrete samples and continuous measurement (Masarie et al., 2001) are valuable means to maintain data quality and identify sampling issues rapidly. On the other hand, on-going comparisons of measurements were emphasized at a co-located site and for the same species, such as between discrete samples and continuous measurement (Masarie et al., 2001).~~ After 2012, long-term trends increased in parallel, with AMY 5.5 ± 0.3 ppm greater than RYO, and RYO 2.9 ± 0.3 ppm greater than WLG.

#### 4. Summary and Conclusions

Now many scientists are on the way to determine regional/national emissions through top-down methods with in situ data, so the importance of high density monitoring stations such as WMO/GAW regional stations is increasing since their data include a lot of information about CO<sub>2</sub> fluxes. In this regard, it remains a challenge for WMO/GAW stations to provide high quality data to better constrain emissions and sinks. In this paper we introduced the three KMA stations and measurement systems for high quality data, and we ~~analysed-analyzed~~ observed CO<sub>2</sub> characteristics with comparisons to other East Asia stations.

KMA instrumented three monitoring stations covering the Korean Peninsula in 2012 with a CRDS and a new drying system at each station. The drying system showed 0.001 to 0.004% water vapour in CRDS when sampling of ambient air, while it was 0.0009% in laboratory cylinders; those values satisfy GAW recommendation, 0.0039% (WMO, 2016). It also suggests the possibility to monitor atmospheric species in humid areas with easy maintenance and remote control of the system.

From 2012 to 2016, our measurement uncertainties, which include components of the drying system, measurement repeatability, reproducibility and scale propagation, are quite similar with 0.116 ppm, 0.114 ppm and 0.114 ppm at AMY, JGS and ULD respectively. In the future those uncertainties may increase as other components of uncertainty, and their variations over time, are added.

We assessed the CO<sub>2</sub> enhancement ~~using relative to~~ local background level at each station; those were 4.3 ± 3.3 ppm at AMY while 1.7 ± 1.3 ppm at JGS and 1 ± 1.9 ppm at ULD during 2012 to 2016. This indicates that AMY has high CO<sub>2</sub> episodes compared to the other stations. ~~Selected-The~~ CO<sub>2</sub> mole fractions observed at AMY and at JGS in the west part of Korea are more sensitive to East Asia (e.g., China) according to wind direction and speed. Meanwhile they also reflect ~~regionally-locally~~ contaminated CO<sub>2</sub> under the stagnant conditions. ~~At JGS, however, local anthropogenic emissions were very limited due to high wind speed and observed CO<sub>2</sub> levels are lower compared to AMY. At JGS, however, local anthropogenic emissions were very limited and the long-transported CO<sub>2</sub> levels are lower compared to AMY due to its high wind speed for all seasons.~~ The diurnal variations at these two stations indicate they reflect the impacts of local vegetation and the degree and speed of atmospheric mixing. ULD, east of the Korean mainland, observed well-mixed air masses with small diurnal variations in CO<sub>2</sub> and similar CO<sub>2</sub> levels regardless of wind direction and speed ~~due to its location. Due to its locations it is affected by mountain and valley breezes mainly.~~

The seasonal variation at AMY is large compared to the other stations in East Asia, indicating that it could be affected by not only vegetation but also ~~added~~ anthropogenic emissions transported from ~~East-Asia~~ Asia continent such as China. CO<sub>2</sub> observed at three KMA stations is higher than at WLG and similar to RYO as expected by their locations, while for growth rate, they are very similar to RYO and WLG during 2012 to 2016.

When AMY was compared to WLG and RYO in East Asia over 15 years, the long-term trend increased with a similar slope but with larger fluctuations compared to the other two stations. This seems to reflect not only carbon sources and sinks but also environment changes at the stations and level of sophisticated measurement expertise.

5 Since CO<sub>2</sub> observed in KMA includes much information about carbon fluxes in East Asia, these data are helpful to improve understanding of the carbon cycle in this region. In addition, to enhance the understanding of CO<sub>2</sub> observations at Korean monitoring stations, isotopes measurements such as <sup>14</sup>C in CO<sub>2</sub> would be very useful (Turnbull et al., 2011).

10 *Acknowledgments.* We would like to thank Dr. Edward Dlugokencky (NOAA/ESRL) for his helpful comments on this paper. We also thank Ryori station in Japan and Waliguan station in China for their data contributions. Finally we appreciate all staff and technicians at AMY, JGS, and ULD in Korea network. This work was funded by the Korea Meteorological Administration Research and Development Program "Research and Development for KMA Weather, Climate, and Earth system Services-Support to Use of Meteorological Information and Value Creation" under Grant (KMA2018-00521).

15

## References

- Andrews, A. E., J. D. Kofler, M. E. Trudeau, J. C. Williams, D. H. Neff, K. A. Masarie, D. Y. Chao, D. R. Kitzis, P. C. Novelli, C. L. Zhao, E. J. Dlugokencky, P. M. Lang, M. J. Crotwell, M. L. Fischer, M. J. Parker, J. T. Lee, D. D. Baumann, A. R. Desai, C. O. Stanier, S. F. J. De Wekker, D. E. Wolfe, J. W. Munger, P. P. Tans: CO<sub>2</sub>, CO, and CH<sub>4</sub> measurements from tall towers in the NOAA Earth System Research Laboratory's Global Greenhouse Gas Reference Network: instrumentation, uncertainty analysis, and recommendations for future high-accuracy greenhouse gas monitoring efforts, *Atmos. Meas. Tech.*, 7, 647-687, 2014
- 5 Betts, Richard A., Chris D. Jones, Jeff R. Knight, Ralph F. Keeling and John J. Kennedy: El Nino and a record CO<sub>2</sub> rise. *Nature Climate Change*, 6, 806-810, 2016
- 10 Canadell, J. G., C. Le Que re ´, M. R. Raupach, C. B. Field, E. Buitenhuis, P. Ciais, T. J. Conway, N. P. Gillett, J. T. Houghton, and G. Marland: Contributions to accelerating atmospheric CO<sub>2</sub> growth from economic activity, carbon intensity, and efficiency of natural sinks, *Proc. Natl. Acad. Sci. U. S. A.*, 104, 18,866 -18,870, doi:10.1073/pnas.0702737104, 2007
- [Chan, D., M. Ishizawa, K. Higuchi, S. Maksyutov, J. Chen.: Seasonal CO<sub>2</sub> rectifier effect and large-scale extratropical atmospheric transport. \*J.Geophys.Res.\*, 113, D17309, doi:10.1029/2007JD009443, 2008.](#)
- 15 Chen, H., J. Winderlich, C. Gerbig, A. Hofer, C.W.Rella, E.R.Crosson, A.D.Van Pelt, J. Steinbach, O.Kolle, V.Beck, B.C.Daube, E.W.Gottlieb, V.Y.Chow, G.W.Santoni, and S.C.Wofsy.: High-accuracy continuous airborne measurement of greenhouse gases (CO<sub>2</sub> and CH<sub>4</sub>) using the cavity ring-down spectroscopy (CRDS) technique, *Atmos.Meas.Tech.*,3,375-386, 2010.
- Crosson, E.R.: A cavity ring-down analyzer for measuring atmospheric levels of methane, carbon dioxide, and water vapor, *Appl.Phys. B*, 92, 403-408, 2008.
- 20 [Denning S., T. Takahashi, P. Friedlingstein.: Can a strong atmospheric CO<sub>2</sub> rectifier effect be reconciled with a “reasonable” carbon budget?. \*Tellus\*, 51B, 249-253, 1999.](#)
- Dlugokencky E.J., J.M. Harris, Y.S. Chung, P.P. Tans, I. Fung.: The relationship between the methane seasonal cycle and regional sources and sinks at Tae-ahn Peninsula, Korea, *Atmospheric environment*, 2115-2120, 1993.
- 25 Dolman, A.J., C. Gerbig, J. Noilhan, C. Sarrat, and F. Miglietta: Detecting regional variability in sources and sinks of carbon dioxide: a synthesis, *Biogeosciences*, 1015-1026, 2009
- Fung, I.Y., C.J. Tucker, and K.C.Prentice.:Application of advanced very high resolution radiometer vegetation index to study atmosphere biosphere exchange of CO<sub>2</sub>, *J.Geophys.Res.*, 92(D3), 2999-3015, 1987
- Graven, H.D., Guilderson, T.P., and Keeling, R.F.: Observations of radiocarbon in CO<sub>2</sub> at La Jolla, California, USA 1992-2007: Analysis of the long-term trend, *J.Geophys.Res.*,117,D02302, <https://doi.org/10.1029/2011JD016533>, 2012
- 30 Higuchi, K., D. Worthy, D. Chan, and A. Shashkov: Regional source/sink impact on the diurnal, seasonal and inter-annual variations in atmospheric CO<sub>2</sub> at a boreal forest site in Canada, *J. Tellus B: Chemical and Physical Meteorology* 55, 2003
- Heimann, M. and M. Reichstein: Terrestrial ecosystem carbon dynamics and climate feedbacks, *Nature*, 451 289 -292, 2008
- [Inoue, H.Y. and Matsueda, H.: Variations in atmospheric CO<sub>2</sub> at the Meteorological Research Institute, Tsukuba, Japan. \*J.Atmosph.Chem.\*, 23:137-161, 1996JCGM 200:2012: International vocabulary of metrology-Basic and general concepts and associated terms \(VIM, 3<sup>rd</sup> edition, 2008 version with minor corrections\). Available: \[https://bipm.org/utis/common/documents/jcgm/JCGM\\\_200\\\_2012.pdf\]\(https://bipm.org/utis/common/documents/jcgm/JCGM\_200\_2012.pdf\), 2012](#)
- 35 Keeling, C.D., R.B. Bacastow, A.F. Carter, S.C.Piper, T.P.Whorf, M. Heimann, W.G.Mook, and H.Roeloffzen: A three-dimensional model of atmospheric CO<sub>2</sub> transport based on observed winds: 1.Analysis of observational data in Aspects of



Climate Variability in the Pacific and the Western Americas, Geophys. Monogr. Ser., vol.55, edited by D.H. Peterson, pp.165-236, AGU, Washington, D.C., 1989

Kim H-S., Y-S Chung, P.P. Tans: A study on carbon dioxide concentrations and carbon isotopes measured in East Asia during 1991-2001, Air Qual Atmos Health, 173-179, 2014

[KMA: Report of Global Atmosphere Watch 2013, Korea Meteorological Administration, 11-1360000-000991-10, 2014](#)

Knorr Wolfgang: Is the airborne fraction of anthropogenic CO<sub>2</sub> emissions increasing?, J.Geophys.Res., 36, L21710, doi:10.1029/2009GL040613, 2009

[Lee, G., H-R Oh, C-H Ho, J. Kim, C-K Song, L-S Chang, J-B Lee, S. Lee: Airborne Measurements of High Pollutant Concentration Events in the Free Troposphere over the West Coast of South Korea between 1997 and 2011. Aerosol Air Qual.Res. 16, 1118-1130, 2016.](#)

~~Verhulst, Kristal R., Anna Karion, Jooil Kim, Peter K. Salameh, Ralph F. Keeling, Sally Newman, John Miller, Christopher Sloop, Thomas Pongetti, Preeti Rao, Clare Wong, Francesca M. Hopkins, Vineet Yadav, Ray F. Weiss, Riley M. Duren, and Charles E. Miller: Carbon dioxide and methane measurements from the Los Angeles Megacity Carbon Project - Part 1: calibration, urban enhancements, and uncertainty estimates, Atmos. Chem. Phys., 17, 8212-8241, 2017.~~

Masarie, K.A., R.L. Langenfelds, C.E. Allison, T.J. Conway, E.J. Dlugokencky, R.J. Francey, P.C. Novelli, L.P. Steele, P.P. Tans, B. Vaughn and J.W.C. White: NOAA/CSIRO, Flask Air Intercomparison Experiment: A Strategy for Directly Assessing Consistency among Atmospheric Measurements Made by Independent Laboratories, Journal of Geophysical Research, 106, 20445-20464, 2001.

~~Pales, J.C. and Keeling, C.D.: The concentration of atmospheric carbon dioxide in Hawaii. J.Geophys.Res., 70:6053-6076, 1965.~~

Rella, C. W., Chen, H., Andrews, A. E., Filges, A., Gerbig, C., Hatakka, J., Karion, A., Miles, N. L., Richardson, S. J., Steinbacher, M., Sweeney, C., Wastine, B., and Zellweger, C.: High accuracy measurements of dry mole fractions of carbon dioxide and methane in humid air, Atmos. Meas. Tech., 6, 837-860, doi:10.5194/amt-6-837-2013, 2013.

Song, B., K.J., Park, H.J. Yoo, and B.C. Choi: A comparative study on two consecutive years' CO<sub>2</sub> and CH<sub>4</sub> measurement from the different height of air sample inlet at KGAWO. Asia-Pacific Journal of Atmospheric Sciences, 41, 851-895, 2005

Stenchikov, G., A. Robock, V. Ramaswamy, M.D. Schwarzkopf, K. Hamilton, and S. Ramachandran: Arctic Oscillation response to the 1991 Mount Pinatubo eruption: Effects of volcanic aerosols and ozone depletion, J. Geophys.Res., 107, 4803, doi:10.1029/2002JD002090, 2002

Thoning K, W., P. P. Tans, and W. D. Komhyr: Atmospheric Carbon dioxide at Mauna Loa Observatory 2. Analysis of the NOAA GMCC Data, 1984-1985. J. Geophys.Res. 8549-8565, 1989

[Tohjima, Y., H. Mukuai, S. Hashimoto, P. K. Patra: Increasing synoptic scale variability in atmospheric CO<sub>2</sub> at Hateruma Island associated with increasing East-Asian emissions, Atmos.Chem.Phys., 10, 453-462, 2010](#)

[Tohjima, Y., M. Kubo, C. Minejima, H. Mukai, H. Tanimoto, A. Ganshin, S. Maksyutov, K. Katsumata, T. Machida, and K. Kita.: Temporal changes in the emissions of CH<sub>4</sub> and CO from China estimated from CH<sub>4</sub>/CO<sub>2</sub> and CO/CO<sub>2</sub> correlations observed at Hateruma Island. Atmos.Chem.Phys., 14, 1663-1677, 2014](#)

Tucker, C.J., I.Y. Fung, C.D. Keeling, and R.H.Gammon: Relationship between atmospheric CO<sub>2</sub> variations and a satellite-derived vegetation index, Nature, 319, 195-199, 1986

Turnbull, J.C., Rayner, P., Miller, J., Newberger, T., Ciais, P. and Cozic, A.: On the use of <sup>14</sup>CO<sub>2</sub> as a tracer for fossil fuel CO<sub>2</sub>: Quantifying uncertainties using an atmospheric transport model, J. Geophys. Res., 114, D22302, <https://doi.org/10.1029/2009JD012308>, 2009

Turnbull, J.C., Pieter P. T., Scott J. Lehman, David Baker, Thomas J. Conway, Y.S.Chung, Jay Gregg, John B. Miller, John R. Southon, and Ling-Xi Zhou: Atmospheric observations of carbon monoxide and fossil fuel CO<sub>2</sub> emissions from East Asia, *J. Geophys. Res.*, 116, D24306, doi:10.1029/2011JD016691, 2011

Turnbull, J.C., Sweeney, C., Karion, A., Newberger, T., Lehman, S.J., Tans, P.P., Davis, K.J., Lauvaux, T., Miles, N.L., Richardson, S.J., Cambaliza, M.O., Shepson, P.B., Gurney, K., Patarasuk, R., and Razlivanoc, I.: Toward quantification and sources sector identification of fossil fuel CO<sub>2</sub> emissions from an urban area: Results from the INFLUX experiment, *J. Geophys. Res.-Atmos.*, 120, 292-312, <https://doi.org/10.1002/2014JD022555>, 2015

[Verhulst, Kristal R., Anna Karion, Jooil Kim, Peter K. Salameh, Ralph F. Keeling, Sally Newman, John Miller, Christopher Sloop, Thomas Pongetti, Preeti Rao, Clare Wong, Francesca M. Hopkins, Vineet Yadav, Ray F. Weiss, Riley M. Duren, and Charles E. Miller: Carbon dioxide and methane measurements from the Los Angeles Megacity Carbon Project. Part I: calibration, urban enhancements, and uncertainty estimates, \*Atmos. Chem. Phys.\*, 17, 8313-8341, 2017.](#)

Wanninkhof, R., Park, G.-H., Takahashi, T., Sweeney, C., Feely, R., Nojiri, Y., Gruber, N., Doney, S. C., McKinley, G. A., Lenton, A., LeQuéré, C., Heinze, C., Schwinger, J., Graven, H., and Khaliwala, S.: Global ocean carbon uptake: magnitude, variability and trends, *Biogeosciences*, 10, 1983–2000, doi:10.5194/bg-10-1983-2013, 2013.

Watanabe Fumio, Osamu Uchino, Yasuhiko Joo, Masamichi Aono, Keishiro Higashijima, Yoshiaki Hitano, Kazuhiro Tsuboi and Kazuto Suda, 2000, Interannual variation of growth rate of atmospheric carbon dioxide concentration observed at the JMA's three monitoring stations: Large increase in concentration of atmospheric carbon dioxide in 1998, *Journal of the Meteorological Society of Japan*, 78, 673-683, 2000

WMO: 18<sup>th</sup> WMO/IAEA Meeting on carbon dioxide, other greenhouse gases and related tracers measurement techniques (GGMT-2015), No.229, 2016

WMO: WMO Global Atmosphere Watch (GAW) Implementation Plan:2016-2023, No.228, 2017

WDCGG: WDCGG DATA SUMMARY, Greenhouse gases and other atmospheric gases, No.41, 2017

WCC-Empa: System and performance audit of methane and carbon dioxide at the regional GAW station Anmyeon-do Republic of Korea Jun, 14/2, pp 18, 2014

WCC-Empa: System and performance audit of surface ozone, carbon monoxide, methane, carbon dioxide and nitrous oxide at the regional GAW station Anmyeon-do Republic of Korea Jun, 17/1, pp 48, 2017 (a)

WCC-Empa: System and performance audit of surface ozone, carbon monoxide, methane, carbon dioxide and nitrous oxide at the regional GAW station Jeju-Gosan Republic of Korea Jun, 17/2, 2017 pp 42, 2017 (b)

Zhao, Cong Long and Tans, Pieter P. : Estimating uncertainty of the WMO mole fraction scale for carbon dioxide in air. *Journal of Geophysical Research*, 111, D08S09, doi:10.1029/2005JD006003, 2006

Zellweger Christoph, Lukas Emmenegger, Mohd Firdaus, Juha Hatakka, Martin Heimann, Elena Kozlova, T. Gerard Spain, Martin Steinbacher, Marcel V. van der Schoot, and Brigitte Buchmann.: Assessment of recent advances in measurement techniques for atmospheric carbon dioxide and methane observations, *Atmos.Meas.Tech.*, 9, 4737-4757, 2016

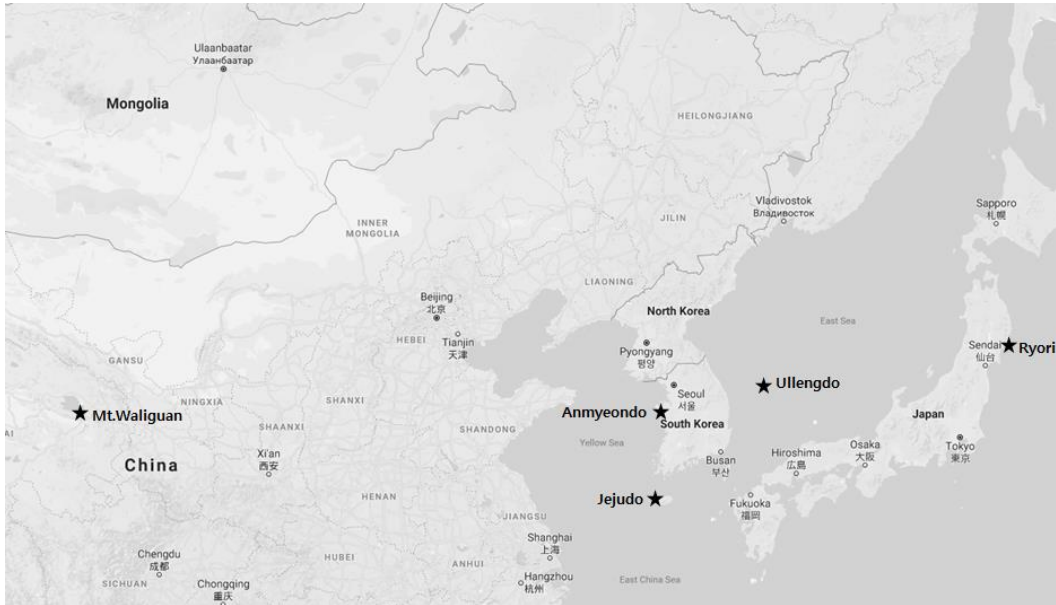

Figure 1. Locations of the three KMA monitoring stations in Korea, and Mt. Waliguan WMO/GAW global station and Ryori WMO/GAW regional station in East Asia.

(a)

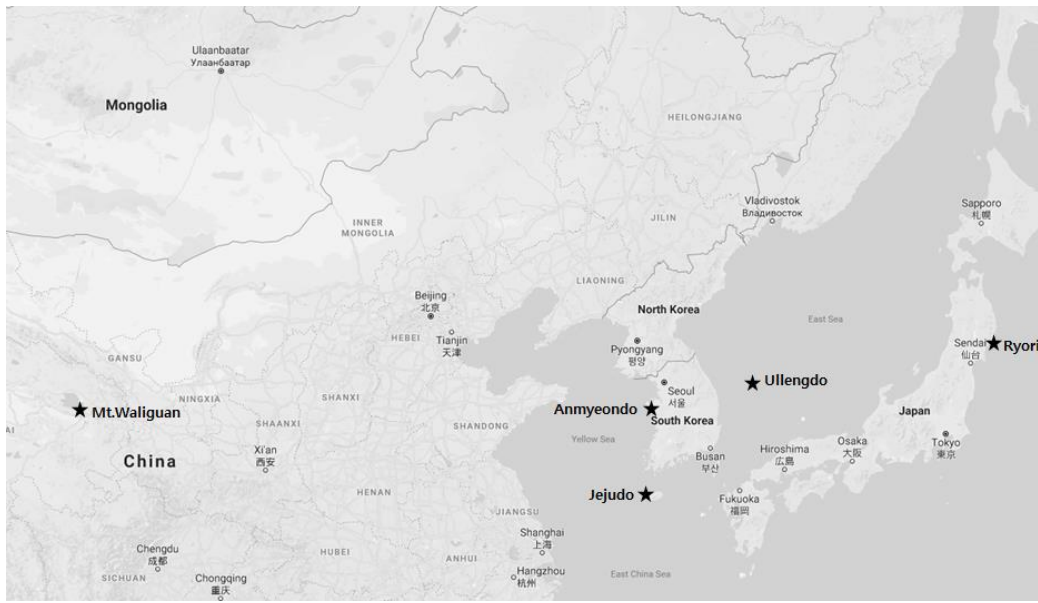

(b)

(c)

(d)

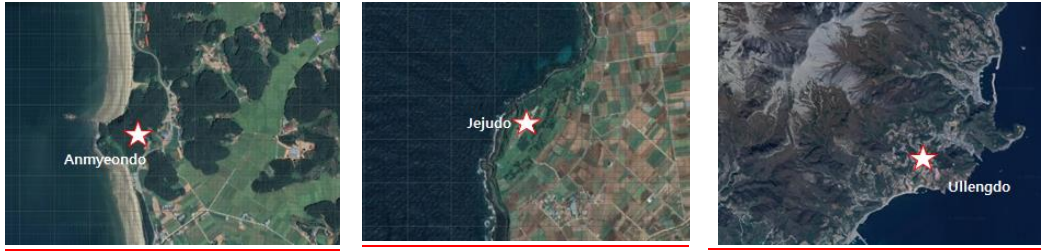

서식 있음: 왼쪽

Figure 1. Locations of (a) the three KMA monitoring stations in Korea, and Mt. Waliguan WMO/GAW global station and Ryori WMO/GAW regional station in East Asia. Surrounding Environment of the (b) Anmyeondo (AMY), (c) Jeju Gosan Suwolbong (JGS), and (d) Ullendo (ULD) station. Those figures are derived from Google map.

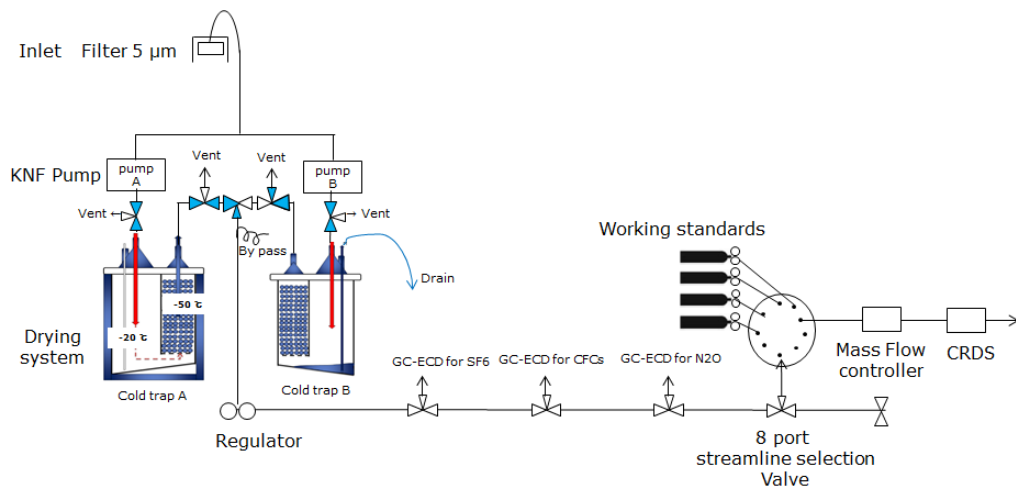

Figure 2. Schematic of the in-situ system when the drying system is at the state of step 3 in AMY, JGS and ULD.

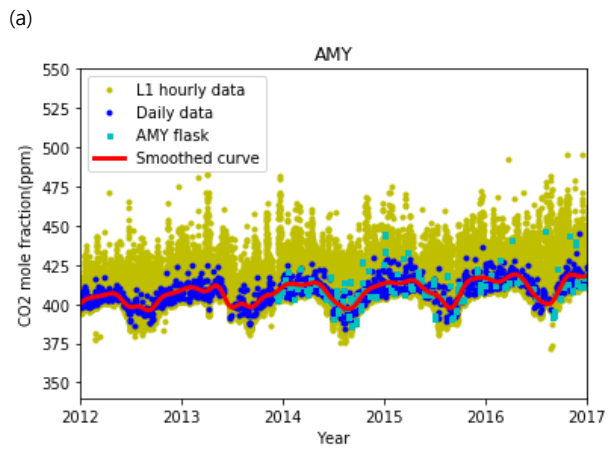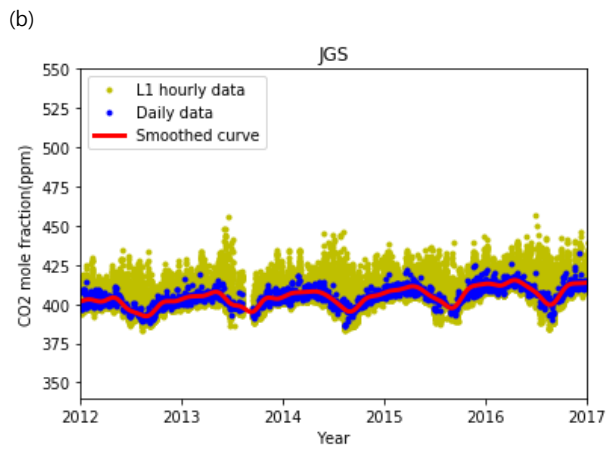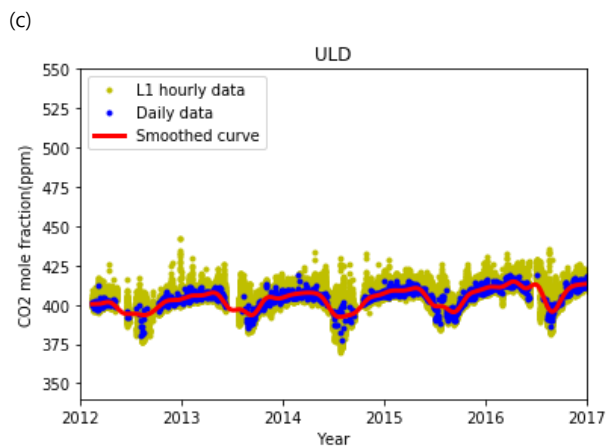

Figure 3. L1 hourly (yellow dots, CO<sub>2</sub> OBS), L2 daily (blue dots) averaged, and smoothed curves fitted to L2 daily averages (red line, CO<sub>2</sub> BG) at (a) AMY, (b) JGS and (c) ULD.

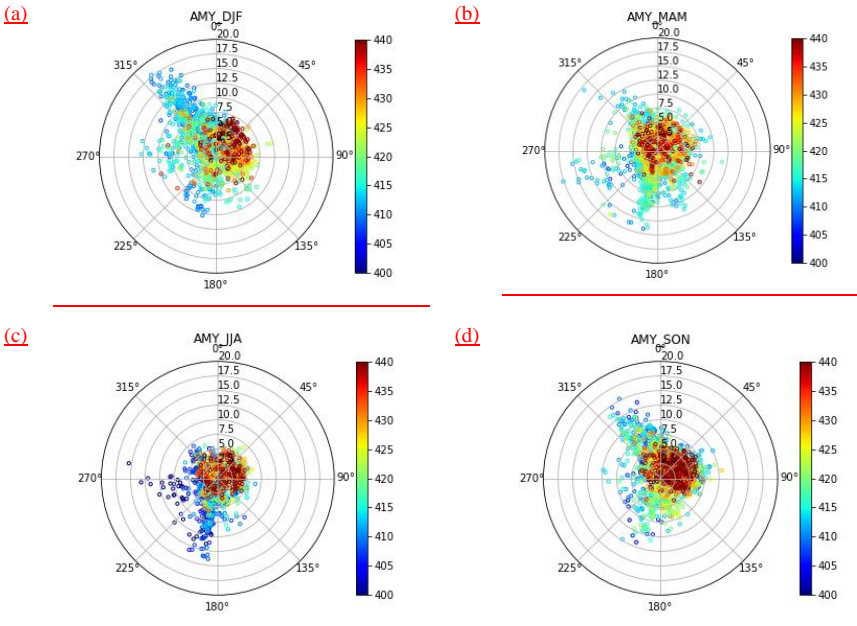

Figure 4. Bivariate polar plots for observed CO<sub>2</sub> (L1) in winter (a), spring (b), summer (c), and autumn (d) at AMY in 2016

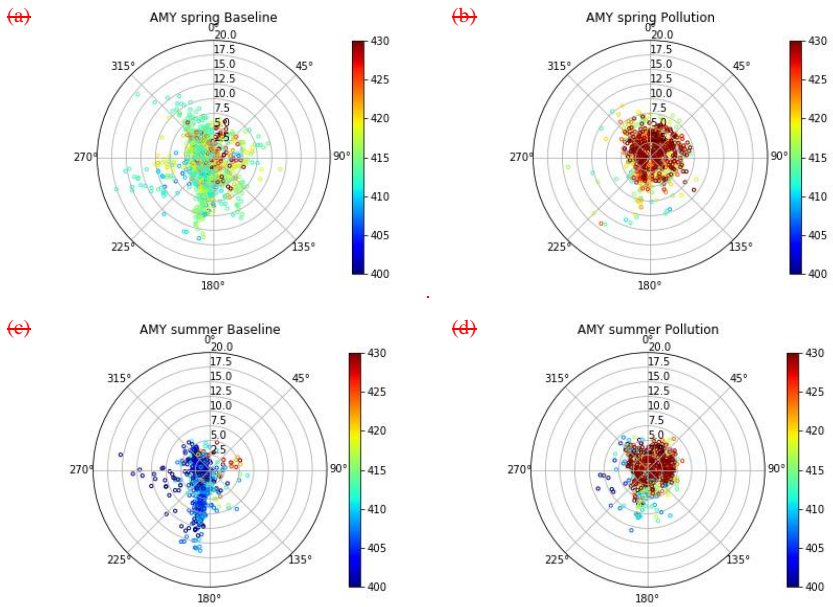

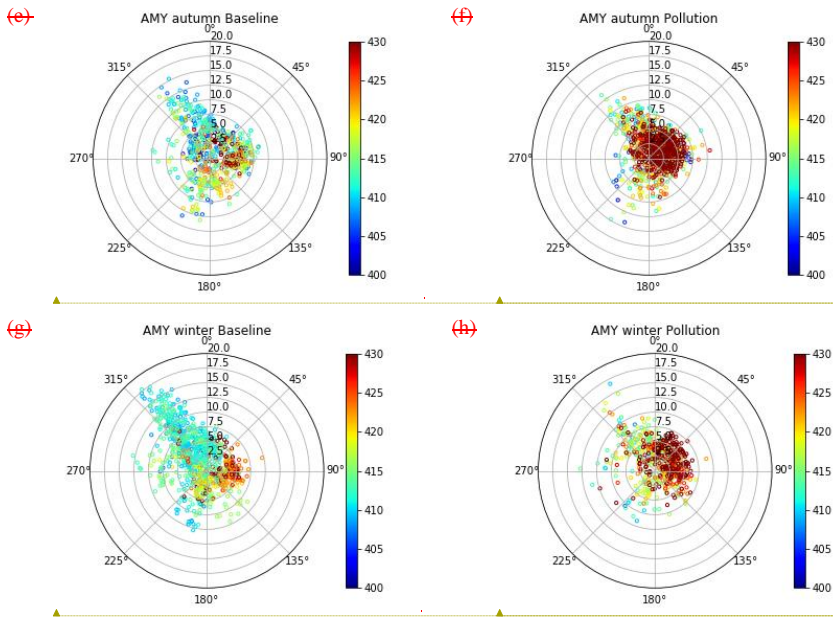

서식 있음: 글꼴: (영어) Times New Roman

Figure 4. Bivariate polar plots for (left panel)-selected baseline CO<sub>2</sub> (L2) and (right panel) polluted CO<sub>2</sub> in spring (L1-L2) (a and b), summer (c and d), autumn (e and f), and in winter (g and h) at AMY in 2016.



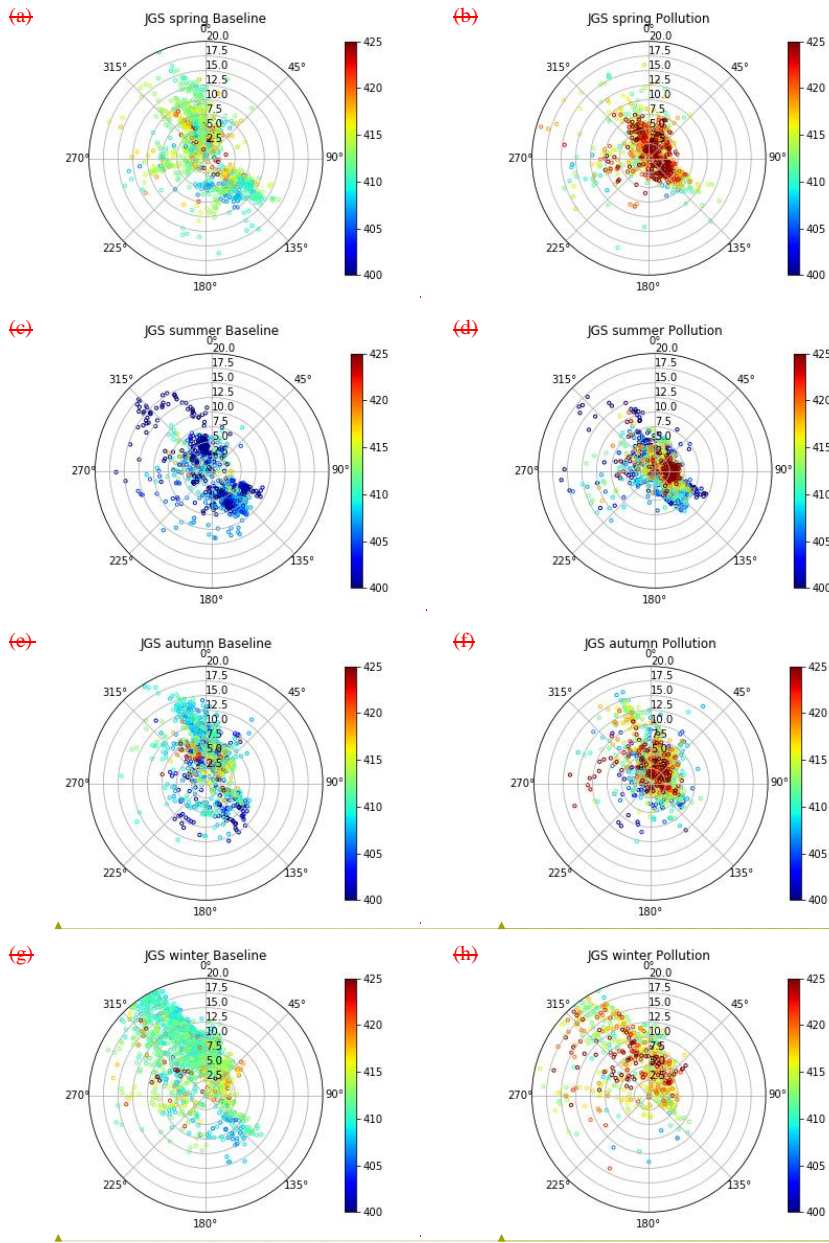

서식 있음: 글꼴: (영어) Times New Roman

Figure 5. Bivariate polar-plots for (left panel) selected baseline CO<sub>2</sub> (L2) and (right panel) polluted CO<sub>2</sub> in spring (L1-L2) (a and b), summer (c and d), autumn (e and f), and in winter (g and h) at JGS in 2016.

(a)

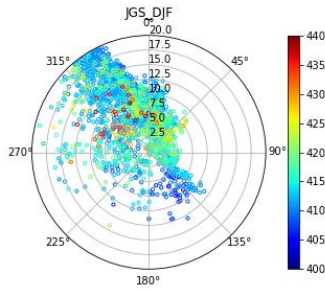

(b)

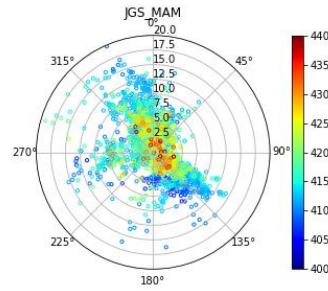

(c)

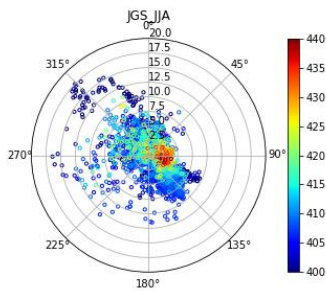

(d)

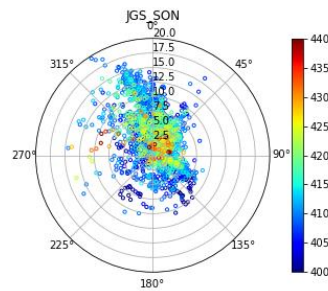

서식 있음: 글꼴: (영어) Times New Roman

서식 있음: 글꼴: (영어) Times New Roman

Figure 5. Bivariate polar plots for observed CO<sub>2</sub> (L1) in winter (a), spring (b), summer (c), and autumn (d) at JGS in 2016

서식 있음: 영어(영국)

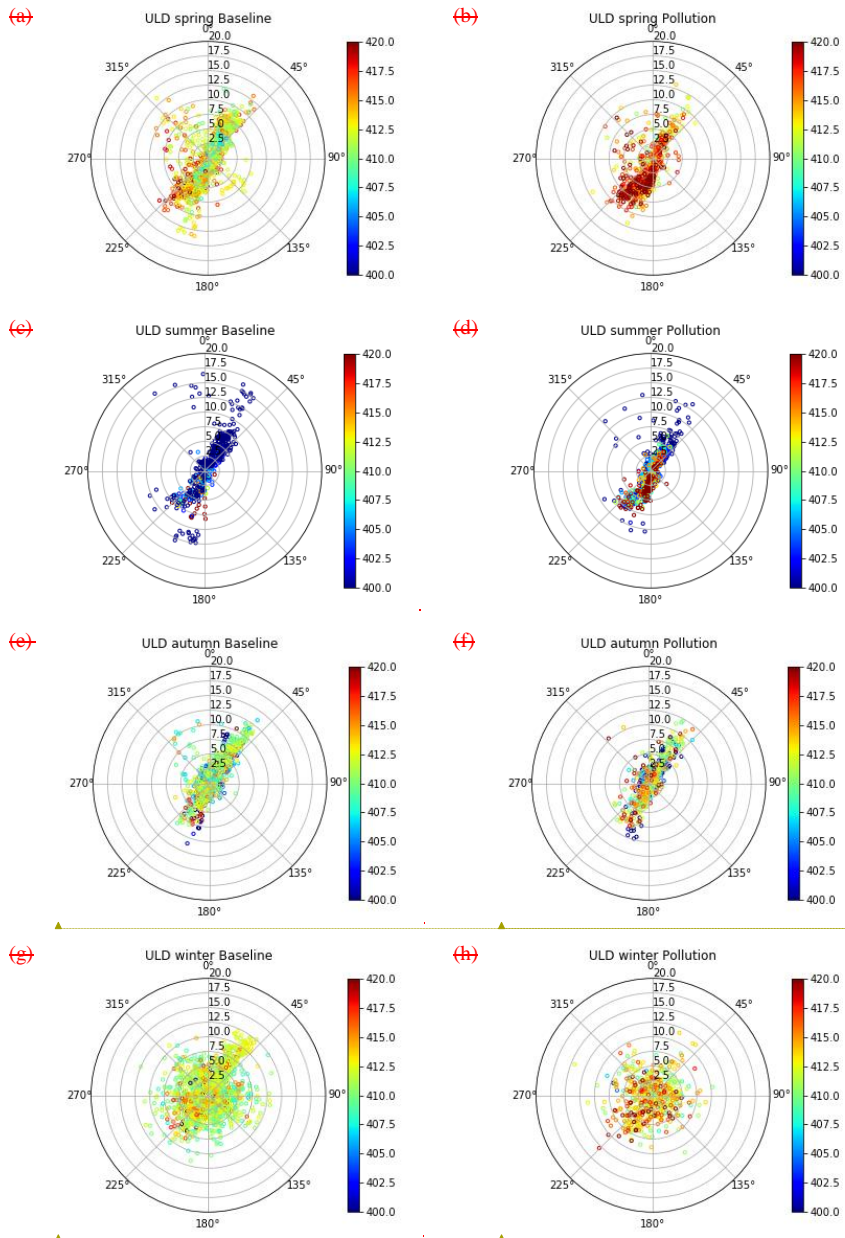

서식 있음: 글꼴: (영어) Times New Roman

Figure 6. Bivariate polar-plots for (left panel) selected baseline CO<sub>2</sub> (L2) and (right panel) polluted CO<sub>2</sub> in spring (L1-L2) (a and b), summer (c and d), autumn (e and f), and in winter (g and h) at ULD in 2016.

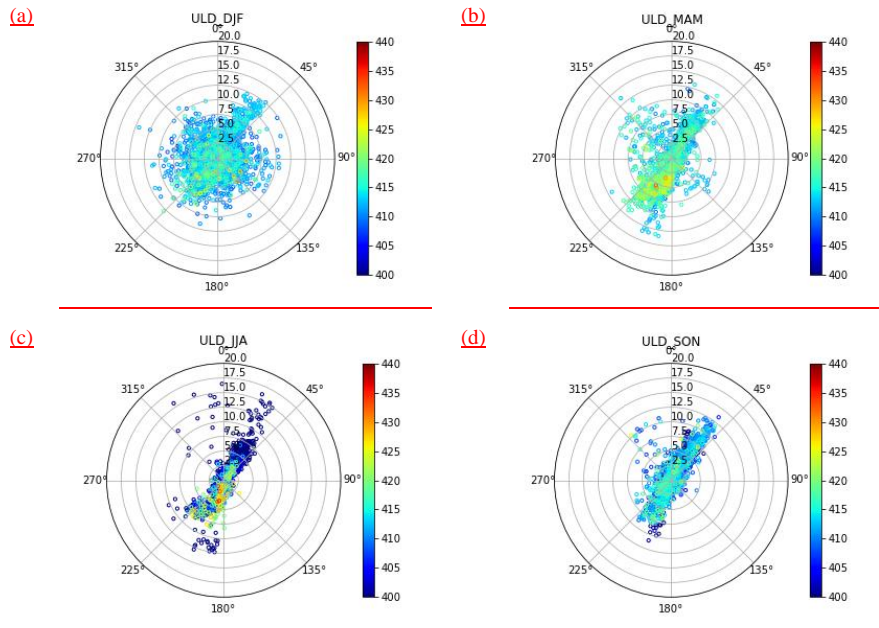

Figure 6. Bivariate polar plots for observed CO<sub>2</sub> (L1) in winter (a), spring (b), summer (c), and autumn (d) at ULD in 2016

서식 있음: 영어(영국)

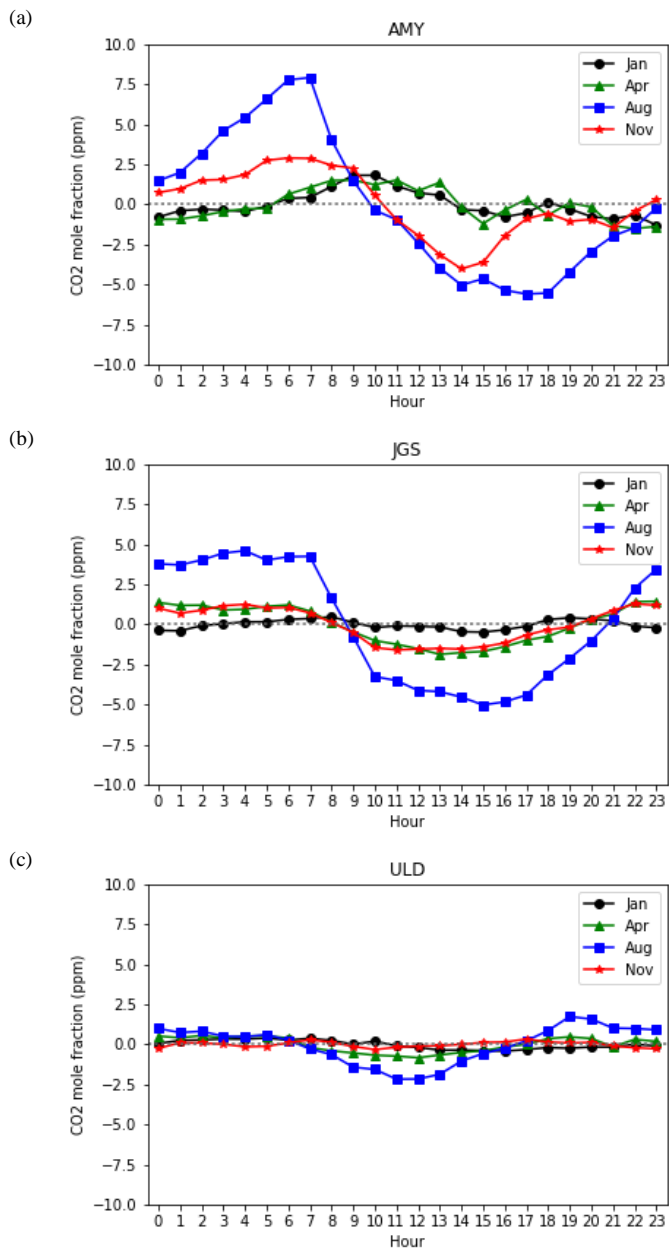

Figure 7. Mean diurnal variations of CO<sub>2</sub> mole fraction. Values show the average departure from the daily mean in January, April, August and November at (a) AMY, (b) JGS and (c) ULD from 2012 to 2016.

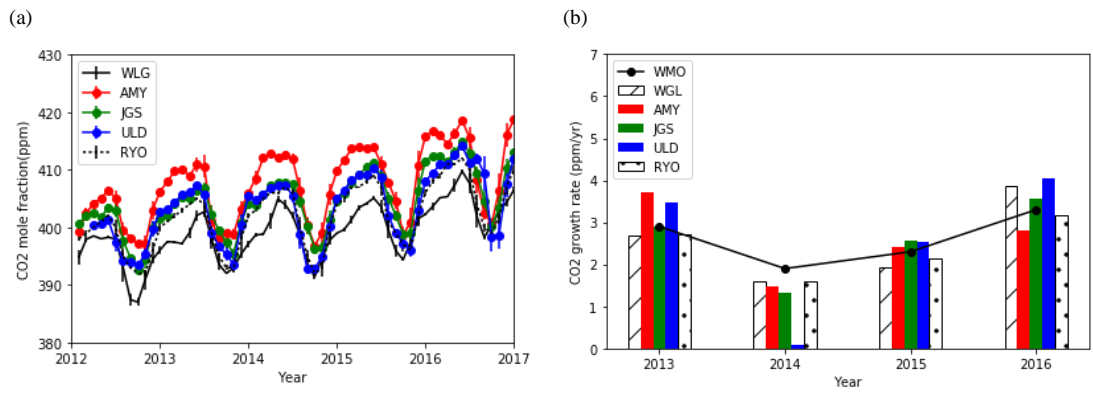

Figure 8. The time series of (a) the monthly mean CO<sub>2</sub> and (b) the annual growth rate at WLG, AMY, JGS, ULD and RYO. Annual growth rate was defined as the increase in the annual mean of de-seasonal (long term trend) values from the corresponding value in the previous year. The growth rate reported by WMO is overlaid on (b) and this value is annual increase (not de-seasonal), absolute differences from the previous year.

5

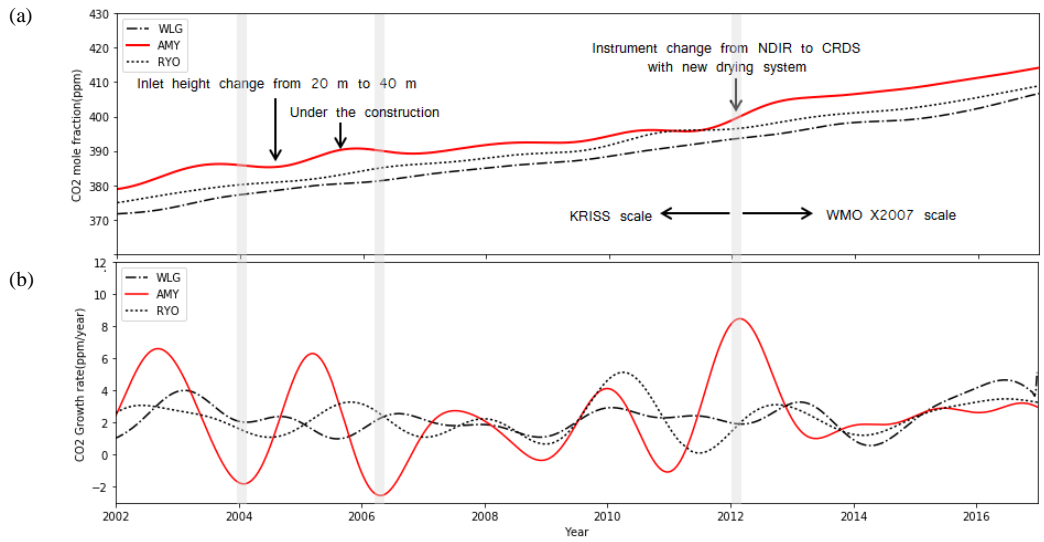

Figure 9. (a) Long-term trend of atmospheric CO<sub>2</sub> and its (b) instantaneous growth rate at WLG, AMY and RYO. Overlaid grey line indicated the period of the negative (in 2004 and 2006) and positive (in 2012) growth rates at AMY compared to other two East Asia stations (WLG and RYO).

Table 1. Information about the three KMA monitoring stations in Korea and the two monitoring stations in East Asia

| Station                       | ID  | Longitude | Latitude | Altitude | Inlet height | Measurement History             |
|-------------------------------|-----|-----------|----------|----------|--------------|---------------------------------|
| Anmyeondo, Korea              | AMY | 126.32°E  | 36.53°N  | 47 m     | 20 m         | Since 1999 <u>to July, 2004</u> |
|                               |     |           |          |          | 40 m         | <u>Since July, 2004</u>         |
| Jejudo Gosan Suwolbong, Korea | JGS | 126.16°E  | 33.30°N  | 71.47 m  | 6 m          | Since 2012                      |
| Ulleungdo*, Korea             | ULD | 130.90°E  | 37.48°N  | 220.9 m  | 10 m         | Since 2012                      |
| Mt. Waliguan, China           | WLG | 100.90°E  | 36.28°N  | 3810 m   | 5 m          | Since 1990                      |
| Ryori, Japan                  | RYO | 141.82°E  | 39.03°N  | 260 m    | 20 m         | Since 1987                      |

\*ULD is not GAW station.



Table 2. The uncertainty estimates for measurements of CO<sub>2</sub> at each station from 2012 to 2016. Units are ppm. All terms are in the 68% confidence interval

| Uncertainty factors | AMY   | JGS   | ULD   |
|---------------------|-------|-------|-------|
| $U_{h_2o}$          | 0.023 | 0.009 | 0.018 |
| $U_p$               | 0.053 | 0.046 | 0.025 |
| $U_r$               | 0.048 | 0.056 | 0.065 |
| $U_{scale}$         | 0.088 | 0.088 | 0.088 |
| $U_T$               | 0.116 | 0.114 | 0.114 |

Table 3. ~~Annual mean CO<sub>2</sub> mole fractions with standard deviations from 2012 to 2016, mean seasonal amplitudes and growth rates. Annual mean abundances from 2012 to 2016, mean seasonal amplitude and growth rates. The uncertainties are standard deviations during each period.~~ Seasonal amplitudes are calculated from the detrended data. CO<sub>2</sub> at ULD, 2012 was calculated only from February to December, without January. Units are dry-air mole fractions (ppm)

| Year                                                         | WLG         | AMY         | JGS         | ULD         | RYO         |
|--------------------------------------------------------------|-------------|-------------|-------------|-------------|-------------|
| 2012                                                         | 394.7 ± 3.9 | 402.8 ± 3.6 | 399.7 ± 3.7 | 398.4 ± 3.6 | 397.6 ± 3.7 |
| 2013                                                         | 397.2 ± 3.1 | 405.4 ± 4.6 | 402.5 ± 3.5 | 401.8 ± 4.4 | 400.1 ± 4.2 |
| 2014                                                         | 398.6 ± 3.8 | 407.8 ± 5.7 | 403.9 ± 4.0 | 401.9 ± 5.5 | 401.7 ± 5.1 |
| 2015                                                         | 401 ± 3.3   | 410.2 ± 5.7 | 407.0 ± 4.5 | 405.0 ± 5.0 | 404.1 ± 4.4 |
| 2016                                                         | 404.9 ± 3.2 | 412.6 ± 6.1 | 410.0 ± 4.6 | 409.3 ± 5.1 | 407.4 ± 4.5 |
| Mean seasonal amplitude over 5 years.                        | 12.2 ± 0.9  | 15.4 ± 3.3  | 13.2 ± 1.7  | 14.2 ± 3.1  | 13.5 ± 1.6  |
| <i>Maximum</i>                                               | 5.4 ± 0.7   | 5.8 ± 0.7   | 4.8 ± 0.4   | 5.4 ± 1.0   | 5.6 ± 0.4   |
| <i>Minimum</i>                                               | -6.8 ± 0.7  | -9.6 ± 2.6  | -8.3 ± 1.3  | -8.8 ± 2.3  | -7.9 ± 1.3  |
| Mean annual growth rate over 5 years (ppm·yr <sup>-1</sup> ) | 2.5 ± 1.1   | 2.5 ± 0.7   | 2.6 ± 0.9   | 2.5 ± 1.7   | 2.4 ± 0.7   |

5
